# Supplementary material for: Conformational preferences of aza-proline residues and their impact on the relative stability of polyproline structures
Source: Royal Society of Chemistry journal article supplement (doi:10.1039/d3nj02713a), 2023-01-01
Supplement: d3nj02713a1.pdf [file d3nj02713a1.pdf]

## Supplementary information

# Conformational preferences of aza-proline residues and their impact on the relative stability of polyproline structures

Hae Sook Park<sup>a</sup> and Young Kee Kang<sup>\*b</sup>

<sup>a</sup> Department of Nursing, Cheju Halla University, Cheju 63092, Republic of Korea

<sup>b</sup> Department of Chemistry, Chungbuk National University, Cheongju, Chungbuk 28644, Republic of Korea

E-mail: ykkang@chungbuk.ac.kr

| Page  | Contents                                                                                                                                                        |
|-------|-----------------------------------------------------------------------------------------------------------------------------------------------------------------|
| s1–s2 | Table of contents                                                                                                                                               |
| s3    | <b>Table S1</b> Torsion angles, relative thermodynamic properties, and populations of local minima for Ac-Pro-OMe in water                                      |
| s4    | <b>Table S2</b> Torsion angles, relative thermodynamic properties, and populations of local minima for Ac- $\alpha$ -azPro-OMe in water                         |
| s5    | <b>Table S3</b> Torsion angles, relative thermodynamic properties, and populations of local minima for Ac- $\beta$ -azPro-OMe in water                          |
| s6    | <b>Table S4</b> Torsion angles, relative thermodynamic properties, and populations of local minima for Ac- $\gamma$ -azPro-OMe in water                         |
| s7    | <b>Table S5</b> Torsion angles, relative thermodynamic properties, and populations of local minima for Ac- $\delta$ -azPro-OMe in water                         |
| s8    | <b>Table S6</b> Torsion angles, relative thermodynamic properties, and populations of local minima for Ac- $\alpha$ -azPro-NHMe in water                        |
| s9    | <b>Fig. S1</b> PPI structures of the polyproline model peptide Ac-Pro <sub>2</sub> - <b>azPro</b> -Pro <sub>2</sub> -NMe <sub>2</sub> (PMP1) optimized in water |
| s10   | <b>Fig. S2</b> PPI structures of the collagen model peptide Ac-Hyp-Gly- <b>azPro</b> -Hyp-Gly-Pro-NMe <sub>2</sub> (CMP1) optimized in water                    |
| s11   | <b>Fig. S3</b> PPI structures of the collagen model peptide Ac-Hyp-Gly-Pro- <b>azPro</b> -Gly-Pro-NMe <sub>2</sub> (CMP2) optimized in water                    |

- s12–s22 Cartesian Coordinates of PPI and PPII structures of the polyproline model peptide Ac-Pro<sub>2</sub>-X-Pro<sub>2</sub>-NMe<sub>2</sub> optimized at the SMD M06-2X/6-31+G(d) level of theory in water
- s23–s33 Cartesian Coordinates of PPI and PPII structures of the collagen model peptide Ac-Hyp-Gly-X-Hyp-Gly-Pro-NMe<sub>2</sub> optimized at the SMD M06-2X/6-31+G(d) level of theory in water
- s34–s41 Cartesian Coordinates of PPI and PPII structures of the collagen model peptide Ac-Hyp-Gly-Pro-X-Gly-Pro-NMe<sub>2</sub> optimized at the SMD M06-2X/6-31+G(d) level of theory in water

**Table S1** Torsion angles, relative thermodynamic properties, and populations of local minima for Ac-Pro-OMe in water<sup>a</sup>

| Conf. | Torsion angles <sup>b</sup> |        |        |          |          |          |          |          | $\Delta E_0^c$ | $\Delta E_w^d$ | $\Delta H_w^e$ | $\Delta G_w^f$ | $w^g$ |
|-------|-----------------------------|--------|--------|----------|----------|----------|----------|----------|----------------|----------------|----------------|----------------|-------|
|       | $\omega'$                   | $\phi$ | $\psi$ | $\chi^0$ | $\chi^1$ | $\chi^2$ | $\chi^3$ | $\chi^4$ |                |                |                |                |       |
| tFd   | 176                         | -63    | 158    | -13      | 31       | -38      | 30       | -11      | 0.00           | 0.00           | 0.00           | 0.00           | 35.6  |
| tAd   | 176                         | -62    | -23    | -13      | 31       | -38      | 30       | -10      | 0.98           | 0.68           | 0.61           | 0.14           | 28.0  |
| tFu   | 180                         | -53    | 143    | 9        | -30      | 40       | -34      | 16       | 0.83           | 0.19           | 0.15           | 0.62           | 12.5  |
| cFd   | -6                          | -74    | 169    | -21      | 35       | -37      | 25       | -2       | 1.22           | 0.72           | 0.70           | 0.65           | 11.8  |
| tAu   | 178                         | -52    | -36    | 6        | -28      | 39       | -35      | 18       | 1.28           | 0.53           | 0.62           | 0.87           | 8.2   |
| cAd   | -8                          | -70    | -13    | -21      | 35       | -37      | 25       | -3       | 1.53           | 1.43           | 1.39           | 1.54           | 2.7   |
| cAu   | -8                          | -52    | -33    | 2        | -24      | 38       | -36      | 22       | 1.89           | 1.82           | 1.96           | 2.38           | 0.6   |
| cFu   | -7                          | -57    | 162    | 1        | -24      | 38       | -36      | 22       | 2.04           | 1.54           | 1.74           | 2.43           | 0.6   |
| ts1   | 116                         | -99    | 80     | 16       | 11       | -34      | 44       | -38      | 18.36          | 22.69          | 21.87          | 23.78          |       |
| ts2   | 115                         | -101   | 43     | 13       | -35      | 42       | -35      | 13       | 19.59          | 23.42          | 22.29          | 23.78          |       |
| ts3   | -62                         | -110   | 76     | 5        | 21       | -38      | 41       | -29      | 22.13          | 22.26          | 21.30          | 22.34          |       |
| ts4   | -58                         | -85    | -91    | 26       | -42      | 42       | -27      | 1        | 24.03          | 23.29          | 22.43          | 23.65          |       |

<sup>a</sup> Calculated at the M06-2X/def2-TZVP//SMD M06-2X/6-31+G(d) level of theory in water at 25 °C: taken from ref. 52 except for ts1 and ts2. <sup>b</sup> Torsion angles are defined in Fig. 1c. <sup>c</sup> Relative energies calculated at the M06-2X/def2-TZVP level of theory in the gas phase. <sup>d</sup> Relative energies in water calculated by the sum of  $\Delta E_0$  and the solvation free energy ( $\Delta\Delta G_s$ ) at the SMD M06-2Z/6-31G(d) level of theory in water. <sup>e</sup>  $\Delta H_w$  are relative enthalpies in water calculated by the sum of  $\Delta E_w$  and thermal-enthalpic contributions at the SMD M06-2Z/6-31G(d) level of theory in water. <sup>f</sup>  $\Delta G_w$  are relative Gibbs free energies in water calculated by the sum of  $\Delta H_w$  and entropic contributions at the SMD M06-2Z/6-31G(d) level of theory in water. <sup>g</sup> Populations in water calculated from  $\Delta G_w$  values at 25 °C.

**Table S2** Torsion angles, relative thermodynamic properties, and populations of local minima for Ac- $\alpha$ -azPro-OMe in water<sup>a</sup>

| Conf. | Torsion angles <sup>b</sup> |        |        |          |          |          |          |          | $\Delta E_0^c$ | $\Delta E_w^d$ | $\Delta H_w^e$ | $\Delta G_w^f$ | $w^g$ |
|-------|-----------------------------|--------|--------|----------|----------|----------|----------|----------|----------------|----------------|----------------|----------------|-------|
|       | $\omega'$                   | $\phi$ | $\psi$ | $\chi^0$ | $\chi^1$ | $\chi^2$ | $\chi^3$ | $\chi^4$ |                |                |                |                |       |
| cFd   | 10                          | -93    | -164   | -24      | 38       | -37      | 23       | 0        | 0.66           | 0.08           | 0.00           | 0.00           | 16.6  |
| cBd   | 11                          | -99    | 22     | -26      | 38       | -36      | 21       | 2        | 0.00           | 0.36           | 0.27           | 0.11           | 13.9  |
| tBd   | -171                        | -88    | 22     | -22      | 37       | -37      | 25       | -2       | 4.43           | 0.16           | 0.10           | 0.13           | 13.3  |
| tB*u  | 171                         | 88     | -22    | 22       | -37      | 37       | -25      | 2        | 4.43           | 0.16           | 0.10           | 0.13           | 13.3  |
| tFe   | -171                        | -80    | -171   | -17      | -8       | 28       | -38      | 34       | 6.12           | 0.12           | 0.11           | 0.36           | 9.0   |
| tFd   | -173                        | -81    | -169   | -19      | 35       | -38      | 27       | -6       | 6.08           | 0.00           | 0.03           | 0.38           | 8.7   |
| tF*u  | 173                         | 81     | 169    | 19       | -35      | 38       | -27      | 6        | 6.08           | 0.00           | 0.03           | 0.38           | 8.7   |
| tB*e  | 170                         | 86     | -16    | 20       | 4        | -25      | 37       | -36      | 4.49           | 0.34           | 0.42           | 0.72           | 4.9   |
| tBe   | -170                        | -86    | 16     | -20      | -4       | 25       | -37      | 36       | 4.49           | 0.34           | 0.42           | 0.72           | 4.9   |
| cFe   | 16                          | -95    | -167   | -22      | -3       | 25       | -38      | 37       | 0.89           | 0.74           | 0.68           | 0.73           | 4.8   |
| cBe   | 18                          | -102   | 18     | -25      | 1        | 22       | -36      | 38       | 0.31           | 1.06           | 1.16           | 1.63           | 1.1   |
| cB*e  | -18                         | 102    | -18    | 25       | -1       | -22      | 36       | -38      | 0.30           | 1.06           | 1.16           | 1.63           | 1.1   |
| ts1   | 116                         | -116   | 23     | -15      | 34       | -39      | 31       | -10      | 15.25          | 17.66          | 16.59          | 18.11          |       |
| ts1   | 116                         | -116   | 23     | -15      | 34       | -39      | 31       | -10      | 15.25          | 17.66          | 16.59          | 18.11          |       |
| ts2   | 115                         | -108   | 13     | -22      | 3        | 16       | -29      | 31       | 13.93          | 15.93          | 14.83          | 15.31          |       |
| ts3   | -74                         | -98    | 14     | -17      | -2       | 19       | -29      | 28       | 18.96          | 15.76          | 14.85          | 15.91          |       |

<sup>a</sup> Calculated at the M06-2X/def2-TZVP//SMD M06-2X/6-31+G(d) level of theory in water at 25 °C. <sup>b</sup> Torsion angles are defined in Fig. 1c. <sup>c</sup> Relative energies calculated at the M06-2X/def2-TZVP level of theory in the gas phase. <sup>d</sup> Relative energies in water calculated by the sum of  $\Delta E_0$  and the solvation free energy ( $\Delta\Delta G_s$ ) at the SMD M06-2Z/6-31G(d) level of theory in water. <sup>e</sup>  $\Delta H_w$  are relative enthalpies in water calculated by the sum of  $\Delta E_w$  and thermal-enthalpic contributions at the SMD M06-2Z/6-31G(d) level of theory in water. <sup>f</sup>  $\Delta G_w$  are relative Gibbs free energies in water calculated by the sum of  $\Delta H_w$  and entropic contributions at the SMD M06-2Z/6-31G(d) level of theory in water. <sup>g</sup> Populations in water calculated from  $\Delta G_w$  values at 25 °C.

**Table S3** Torsion angles, relative thermodynamic properties, and populations of local minima for Ac- $\beta$ -azPro-OMe in water<sup>a</sup>

| Conf. | Torsion angles <sup>b</sup> |        |        |          |          |          |          |          | $\Delta E_0^c$ | $\Delta E_w^d$ | $\Delta H_w^e$ | $\Delta G_w^f$ | $w^g$ |
|-------|-----------------------------|--------|--------|----------|----------|----------|----------|----------|----------------|----------------|----------------|----------------|-------|
|       | $\omega'$                   | $\phi$ | $\psi$ | $\chi^0$ | $\chi^1$ | $\chi^2$ | $\chi^3$ | $\chi^4$ |                |                |                |                |       |
| tFd   | 173                         | -56    | 149    | -8       | 26       | -35      | 29       | -13      | 0.00           | 0.00           | 0.00           | 0.00           | 42.6  |
| tAd   | 175                         | -54    | -37    | -7       | 25       | -34      | 28       | -13      | 1.66           | 0.64           | 0.45           | 0.25           | 28.1  |
| cFd   | -5                          | -70    | 160    | -18      | 32       | -34      | 23       | -3       | 1.50           | 1.03           | 1.01           | 0.37           | 22.6  |
| cAd   | -7                          | -63    | -25    | -17      | 31       | -34      | 24       | -4       | 2.51           | 1.70           | 1.67           | 1.50           | 3.4   |
| tFu   | 179                         | -53    | 142    | 7        | -30      | 42       | -36      | 18       | 2.90           | 2.45           | 2.12           | 1.88           | 1.8   |
| cFu   | -1                          | -55    | 138    | 10       | -30      | 39       | -32      | 13       | 2.07           | 2.30           | 2.26           | 2.31           | 0.9   |
| tAu   | 177                         | -52    | -36    | 3        | -27      | 41       | -37      | 21       | 2.37           | 2.62           | 2.37           | 2.61           | 0.5   |
| cAu   | -10                         | -50    | -33    | 1        | -25      | 39       | -37      | 23       | 2.94           | 4.26           | 3.89           | 3.43           | 0.1   |
| ts1   | 120                         | -107   | -92    | 7        | 18       | -36      | 40       | -28      | 17.52          | 21.55          | 20.36          | 21.07          |       |
| ts2   | 120                         | -107   | 77     | 12       | -33      | 40       | -32      | 12       | 16.16          | 20.65          | 19.48          | 20.41          |       |
| ts3   | -58                         | -114   | 75     | 2        | 22       | -37      | 38       | -24      | 22.51          | 20.10          | 19.09          | 20.47          |       |
| ts4   | -60                         | -87    | -98    | 25       | -40      | 39       | -23      | -1       | 22.10          | 21.31          | 20.31          | 21.36          |       |

<sup>a</sup> Calculated at the M06-2X/def2-TZVP//SMD M06-2X/6-31+G(d) level of theory in water at 25 °C. <sup>b</sup> Torsion angles are defined in Fig. 1c. <sup>c</sup> Relative energies calculated at the M06-2X/def2-TZVP level of theory in the gas phase. <sup>d</sup> Relative energies in water calculated by the sum of  $\Delta E_0$  and the solvation free energy ( $\Delta\Delta G_s$ ) at the SMD M06-2Z/6-31G(d) level of theory in water. <sup>e</sup>  $\Delta H_w$  are relative enthalpies in water calculated by the sum of  $\Delta E_w$  and thermal-enthalpic contributions at the SMD M06-2Z/6-31G(d) level of theory in water. <sup>f</sup>  $\Delta G_w$  are relative Gibbs free energies in water calculated by the sum of  $\Delta H_w$  and entropic contributions at the SMD M06-2Z/6-31G(d) level of theory in water. <sup>g</sup> Populations in water calculated from  $\Delta G_w$  values at 25 °C.

**Table S4** Torsion angles, relative thermodynamic properties, and populations of local minima for Ac- $\gamma$ -azPro-OMe in water<sup>a</sup>

| Conf. | Torsion angles <sup>b</sup> |        |        |          |          |          |          |          | $\Delta E_0^c$ | $\Delta E_w^d$ | $\Delta H_w^e$ | $\Delta G_w^f$ | $w^g$ |
|-------|-----------------------------|--------|--------|----------|----------|----------|----------|----------|----------------|----------------|----------------|----------------|-------|
|       | $\omega'$                   | $\phi$ | $\psi$ | $\chi^0$ | $\chi^1$ | $\chi^2$ | $\chi^3$ | $\chi^4$ |                |                |                |                |       |
| tFd   | 173                         | -56    | 149    | -7       | 28       | -38      | 33       | -16      | 0.00           | 0.00           | 0.00           | 0.00           | 38.8  |
| tFu   | 178                         | -53    | 144    | 5        | -26      | 38       | -35      | 18       | 1.83           | 0.64           | 0.63           | 0.37           | 20.9  |
| cFd   | -2                          | -70    | 160    | -12      | 30       | -38      | 30       | -11      | 1.01           | 0.69           | 0.71           | 0.40           | 19.8  |
| tAd   | 174                         | -52    | -37    | -6       | 27       | -38      | 34       | -17      | 1.53           | 0.71           | 0.73           | 0.81           | 9.8   |
| cAd   | -6                          | -61    | -31    | -13      | 31       | -38      | 29       | -9       | 1.66           | 1.51           | 1.52           | 1.32           | 4.2   |
| tAu   | 177                         | -51    | -37    | 3        | -25      | 38       | -35      | 20       | 2.32           | 0.94           | 1.04           | 1.39           | 3.7   |
| cFu   | -6                          | -58    | 165    | 2        | -24      | 37       | -36      | 21       | 2.53           | 1.70           | 1.73           | 1.65           | 2.4   |
| cAu   | -9                          | -51    | -33    | 1        | -23      | 37       | -36      | 22       | 2.39           | 1.97           | 2.22           | 2.90           | 0.3   |
| ts1   | 120                         | -94    | 17     | 22       | 3        | -28      | 42       | -40      | 19.03          | 22.19          | 21.28          | 22.16          |       |
| ts2   | 120                         | -119   | 21     | -2       | -22      | 36       | -39      | 26       | 18.54          | 21.52          | 20.50          | 21.55          |       |
| ts3   | -61                         | -109   | 66     | 6        | 23       | -43      | 47       | -32      | 26.84          | 24.71          | 23.64          | 24.77          |       |
| ts4   | -61                         | -97    | 46     | 17       | -35      | 40       | -30      | 8        | 24.19          | 21.41          | 20.37          | 21.50          |       |

<sup>a</sup> Calculated at the M06-2X/def2-TZVP//SMD M06-2X/6-31+G(d) level of theory in water at 25 °C. <sup>b</sup> Torsion angles are defined in Fig. 1c. <sup>c</sup> Relative energies calculated at the M06-2X/def2-TZVP level of theory in the gas phase. <sup>d</sup> Relative energies in water calculated by the sum of  $\Delta E_0$  and the solvation free energy ( $\Delta\Delta G_s$ ) at the SMD M06-2Z/6-31G(d) level of theory in water. <sup>e</sup>  $\Delta H_w$  are relative enthalpies in water calculated by the sum of  $\Delta E_w$  and thermal-enthalpic contributions at the SMD M06-2Z/6-31G(d) level of theory in water. <sup>f</sup>  $\Delta G_w$  are relative Gibbs free energies in water calculated by the sum of  $\Delta H_w$  and entropic contributions at the SMD M06-2Z/6-31G(d) level of theory in water. <sup>g</sup> Populations in water calculated from  $\Delta G_w$  values at 25 °C.

**Table S5** Torsion angles, relative thermodynamic properties, and populations of local minima for Ac- $\delta$ -azPro-OMe in water<sup>a</sup>

| Conf. | Torsion angles <sup>b</sup> |        |        |          |          |          |          |          | $\Delta E_0^c$ | $\Delta E_w^d$ | $\Delta H_w^e$ | $\Delta G_w^f$ | $w^g$ |
|-------|-----------------------------|--------|--------|----------|----------|----------|----------|----------|----------------|----------------|----------------|----------------|-------|
|       | $\omega'$                   | $\phi$ | $\psi$ | $\chi^0$ | $\chi^1$ | $\chi^2$ | $\chi^3$ | $\chi^4$ |                |                |                |                |       |
| tAd   | 172                         | -47    | -40    | -1       | 22       | -36      | 35       | -22      | 0.77           | 0.53           | 0.47           | 0.00           | 43.5  |
| tFu   | -177                        | -63    | 150    | 0        | -23      | 37       | -37      | 23       | 0.00           | 0.15           | 0.19           | 0.16           | 33.2  |
| tFd   | 171                         | -50    | 148    | -3       | 24       | -37      | 35       | -20      | 0.03           | 0.00           | 0.00           | 0.59           | 16.1  |
| tAu   | -179                        | -60    | -33    | -2       | -21      | 37       | -37      | 25       | 0.74           | 0.49           | 0.58           | 1.23           | 5.5   |
| cFu   | -5                          | -64    | 165    | -8       | -16      | 33       | -38      | 29       | 6.02           | 1.52           | 1.75           | 2.38           | 0.8   |
| cAu   | -5                          | -57    | -31    | -2       | -21      | 36       | -37      | 25       | 5.88           | 1.88           | 2.03           | 2.65           | 0.5   |
| cFd   | -7                          | -63    | 162    | -10      | 31       | -41      | 35       | -16      | 5.03           | 2.65           | 2.76           | 3.13           | 0.2   |
| cAd   | -7                          | -57    | -29    | -7       | 26       | -37      | 33       | -16      | 6.56           | 2.24           | 2.39           | 3.35           | 0.2   |
| ts1   | 124                         | -152   | 101    | -28      | 16       | 0        | -18      | 29       | 14.43          | 19.30          | 18.33          | 19.83          |       |
| ts2   | 120                         | -112   | 78     | 8        | -28      | 39       | -35      | 17       | 15.73          | 19.79          | 18.75          | 20.37          |       |
| ts3   | -50                         | -147   | 100    | -26      | 19       | -6       | -10      | 22       | 18.62          | 19.63          | 18.92          | 20.35          |       |

<sup>a</sup> Calculated at the M06-2X/def2-TZVP//SMD M06-2X/6-31+G(d) level of theory in water at 25 °C. <sup>b</sup> Torsion angles are defined in Fig. 1c. <sup>c</sup> Relative energies calculated at the M06-2X/def2-TZVP level of theory in the gas phase. <sup>d</sup> Relative energies in water calculated by the sum of  $\Delta E_0$  and the solvation free energy ( $\Delta\Delta G_s$ ) at the SMD M06-2Z/6-31G(d) level of theory in water. <sup>e</sup>  $\Delta H_w$  are relative enthalpies in water calculated by the sum of  $\Delta E_w$  and thermal-enthalpic contributions at the SMD M06-2Z/6-31G(d) level of theory in water. <sup>f</sup>  $\Delta G_w$  are relative Gibbs free energies in water calculated by the sum of  $\Delta H_w$  and entropic contributions at the SMD M06-2Z/6-31G(d) level of theory in water. <sup>g</sup> Populations in water calculated from  $\Delta G_w$  values at 25 °C.

**Table S6** Torsion angles, relative thermodynamic properties, and populations of local minima for Ac- $\alpha$ -azPro-NHMe in water<sup>a</sup>

| Conf. | Torsion angles <sup>b</sup> |        |        |          |          |          |          |          | $\Delta E_0^c$ | $\Delta E_w^d$ | $\Delta H_w^e$ | $\Delta G_w^f$ | $w^g$ |
|-------|-----------------------------|--------|--------|----------|----------|----------|----------|----------|----------------|----------------|----------------|----------------|-------|
|       | $\omega'$                   | $\phi$ | $\psi$ | $\chi^0$ | $\chi^1$ | $\chi^2$ | $\chi^3$ | $\chi^4$ |                |                |                |                |       |
| cDd   | 13                          | -109   | 18     | -28      | 40       | -37      | 21       | 4        | 0.00           | 0.00           | 0.00           | 0.00           | 17.6  |
| tBd   | -170                        | -90    | 33     | -22      | 38       | -39      | 25       | -3       | 2.01           | 0.14           | 0.95           | 0.06           | 16.0  |
| tB*u  | 170                         | 90     | -33    | 22       | -38      | 39       | -25      | 3        | 2.01           | 0.14           | 0.95           | 0.06           | 16.0  |
| cFd   | 2                           | -87    | -173   | -28      | 39       | -36      | 20       | 5        | 4.77           | 0.60           | 1.40           | 0.28           | 11.0  |
| tF*u  | 176                         | 80     | 172    | 24       | -38      | 38       | -23      | 0        | 9.99           | 0.89           | 1.67           | 0.31           | 10.4  |
| tFd   | -176                        | -80    | -172   | -24      | 38       | -38      | 23       | 0        | 9.99           | 0.89           | 1.67           | 0.31           | 10.4  |
| tBe   | -168                        | -92    | 16     | -19      | -6       | 27       | -38      | 36       | 4.89           | 0.55           | 1.42           | 0.47           | 8.0   |
| tB*e  | 168                         | 92     | -16    | 19       | 6        | -27      | 38       | -36      | 4.89           | 0.55           | 1.42           | 0.47           | 8.0   |
| cFe   | 13                          | -96    | -168   | -22      | -3       | 26       | -38      | 37       | 5.13           | 1.72           | 2.50           | 1.15           | 2.5   |
| ts1   | 118                         | -129   | 17     | -28      | 12       | 9        | -25      | 33       | 13.74          | 15.51          | 15.10          | 14.57          |       |
| ts3   | -73                         | -109   | 17     | -7       | 29       | -39      | 35       | -19      | 15.48          | 16.28          | 15.89          | 15.89          |       |
| ts4   | -69                         | -110   | 16     | -15      | -4       | 21       | -30      | 28       | 14.87          | 15.05          | 15.00          | 14.86          |       |

<sup>a</sup> Calculated at the M06-2X/def2-TZVP//PCM M06-2X/6-31+G(d) level of theory in water at 25 °C. <sup>b</sup> Torsion angles are defined in Fig. 1c. <sup>c</sup> Relative energies calculated at the M06-2X/def2-TZVP level of theory in the gas phase. <sup>d</sup> Relative energies in water calculated by the sum of  $\Delta E_0$  and the solvation free energy ( $\Delta\Delta G_s$ ) at the SMD M06-2Z/6-31G(d) level of theory in water. <sup>e</sup>  $\Delta H_w$  are relative enthalpies in water calculated by the sum of  $\Delta E_w$  and thermal-enthalpic contributions at the SMD M06-2Z/6-31G(d) level of theory in water. <sup>f</sup>  $\Delta G_w$  are relative Gibbs free energies in water calculated by the sum of  $\Delta H_w$  and entropic contributions at the SMD M06-2Z/6-31G(d) level of theory in water. <sup>g</sup> Populations in water calculated from  $\Delta G_w$  values at 25 °C.



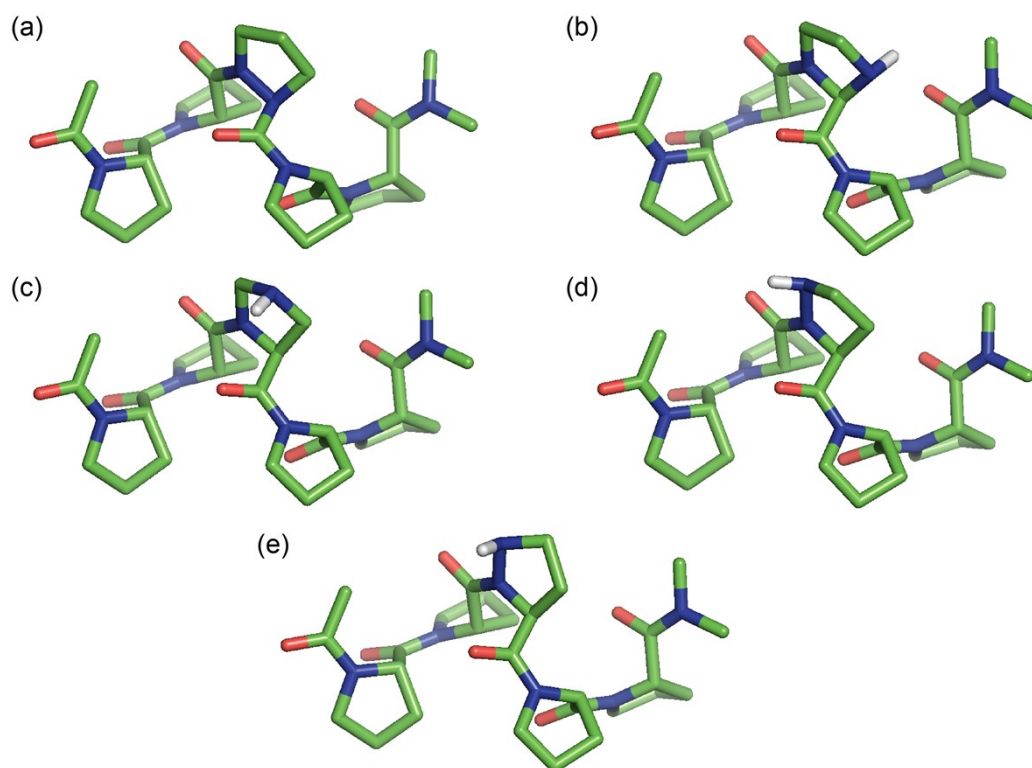

**Fig. S1** PPI structures of the polyproline model peptide Ac-Pro<sub>2</sub>-azPro-Pro<sub>2</sub>-NMe<sub>2</sub> (PMP1) optimized at the SMD M06-2X/6-31+G(d) level of theory in water: (a)  $\alpha$ -azPro(d), (b)  $\beta$ -azPro(d), (c)  $\gamma$ -azPro(d), (d)  $\delta$ -azPro(d), and (e)  $\delta$ -azPro(u).

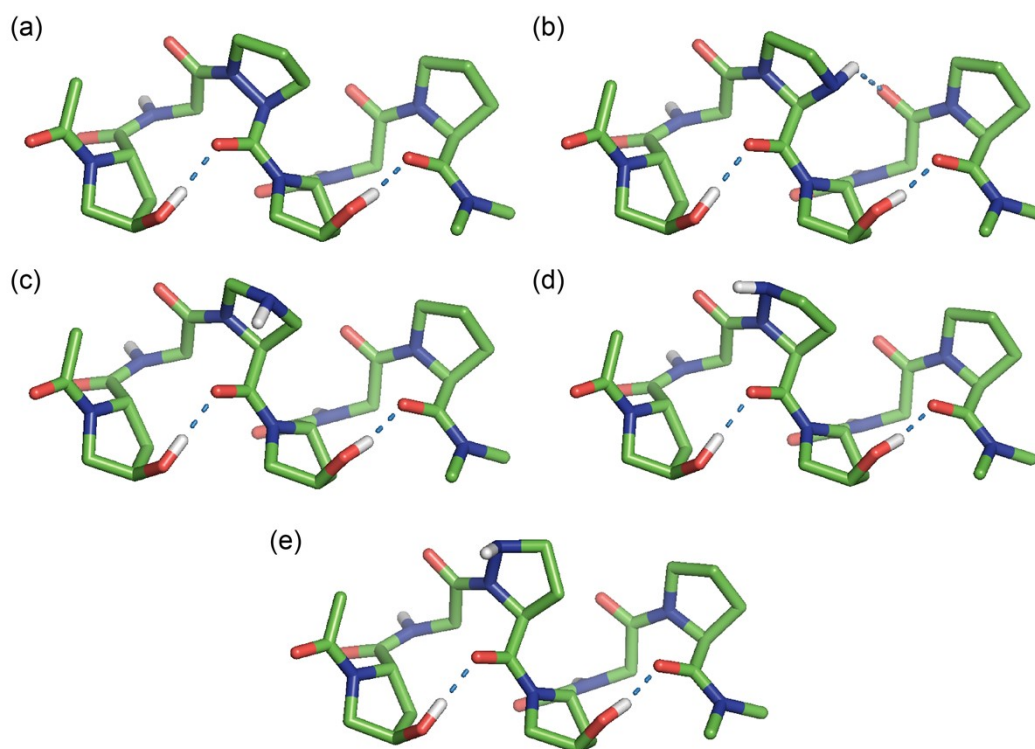

**Fig. S2** PPI structures of the collagen model peptide Ac-Hyp-Gly-azPro-Hyp-Gly-Pro-NMe<sub>2</sub> (CMP1) optimized at the SMD M06-2X/6-31+G(d) level of theory in water: (a)  $\alpha$ -azPro(d), (b)  $\beta$ -azPro(d), (c)  $\gamma$ -azPro(d), (d)  $\delta$ -azPro(d), and (e)  $\delta$ -azPro(u). H-bonds are represented by dotted lines.

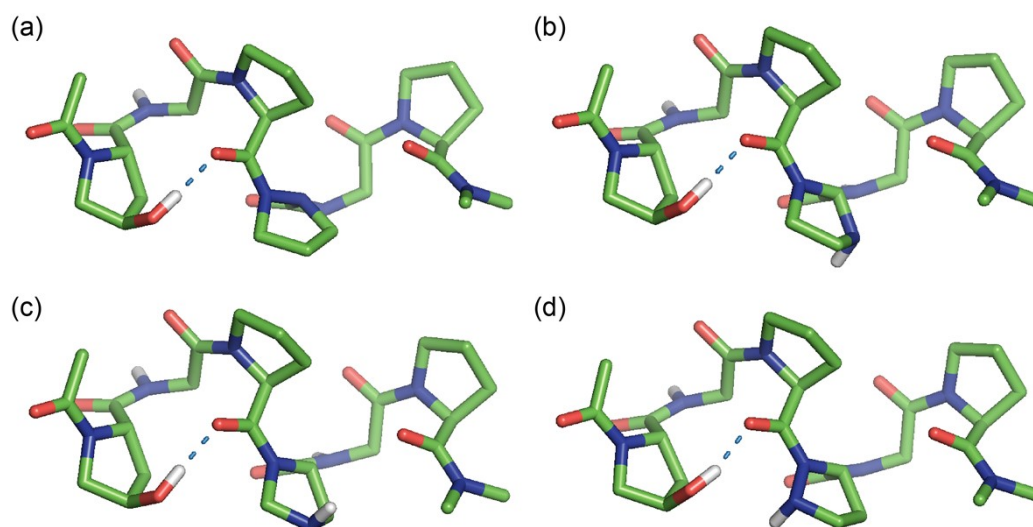

**Fig. S3** PPI structures of the collagen model peptide Ac-Hyp-Gly-Pro-azPro-Gly-Pro-NMe<sub>2</sub> (CMP2) optimized at the SMD M06-2X/6-31+G(d) level of theory in water: (a)  $\alpha$ -azPro(u), (b)  $\beta$ -azPro(u), (c)  $\gamma$ -azPro(u), and (d)  $\delta$ -azPro(u). H-bonds are represented by dotted lines.

Cartesian Coordinates of PPI and PPII structures of the polyproline model peptide Ac-Pro<sub>2</sub>-X-Pro<sub>2</sub>-NMe<sub>2</sub> optimized at the SMD M06-2X/6-31+G(d) level of theory in water:

|                                           |           |           |           |                     |           |           |           |
|-------------------------------------------|-----------|-----------|-----------|---------------------|-----------|-----------|-----------|
| (1) Ac-Pro <sub>5</sub> -NMe <sub>2</sub> |           |           |           | H                   | -4.79506  | -1.974301 | -0.096376 |
|                                           |           |           |           | H                   | -4.253906 | -1.474464 | -1.706256 |
| (1a) PPI structure                        |           |           |           | H                   | -2.902101 | -0.035548 | -0.595952 |
|                                           |           |           |           | H                   | -2.011892 | 1.969455  | 1.02447   |
| C                                         | -5.117237 | -1.506317 | -1.032793 | H                   | -2.576594 | 2.308607  | -0.623672 |
| C                                         | -5.654063 | -0.12104  | -0.779901 | H                   | -4.217302 | 2.53322   | 1.956384  |
| O                                         | -6.832535 | 0.182849  | -1.049772 | H                   | -3.981983 | 3.795521  | 0.734771  |
| N                                         | -4.809114 | 0.789313  | -0.266401 | H                   | -6.183101 | 2.079698  | 0.688972  |
| C                                         | -3.447973 | 0.515051  | 0.175033  | H                   | -5.475189 | 2.711025  | -0.8103   |
| C                                         | -2.8787   | 1.935088  | 0.360066  | H                   | -0.829352 | 0.032928  | 0.636368  |
| C                                         | -4.084968 | 2.719012  | 0.885737  | H                   | 0.797405  | -1.9426   | 1.570445  |
| C                                         | -5.263762 | 2.139664  | 0.100015  | H                   | 0.330336  | -0.575203 | 2.60427   |
| C                                         | -3.44857  | -0.264229 | 1.497555  | H                   | -0.985458 | -3.34338  | 2.505153  |
| O                                         | -4.461648 | -0.306702 | 2.213925  | H                   | -0.382519 | -2.501744 | 3.942879  |
| N                                         | -2.298764 | -0.850145 | 1.863255  | H                   | -3.053784 | -2.349277 | 3.143724  |
| C                                         | -1.096443 | -0.948095 | 1.039812  | H                   | -2.253787 | -0.992833 | 3.963823  |
| C                                         | -0.046043 | -1.442018 | 2.050848  | H                   | 1.1589    | -0.744181 | -0.400568 |
| C                                         | -0.857832 | -2.36093  | 2.970083  | H                   | 2.016366  | -0.728739 | -2.988676 |
| C                                         | -2.210101 | -1.655605 | 3.093223  | H                   | 2.136826  | -2.196516 | -1.991892 |
| C                                         | -1.291172 | -1.96244  | -0.095181 | H                   | -0.090687 | -1.484864 | -3.976471 |
| O                                         | -2.166635 | -2.839692 | -0.027538 | H                   | 0.851731  | -2.98506  | -3.927774 |
| N                                         | -0.459531 | -1.872139 | -1.141422 | H                   | -1.627716 | -2.750803 | -2.664788 |
| C                                         | 0.581595  | -0.864902 | -1.321223 | H                   | -0.348283 | -3.790882 | -2.006854 |
| C                                         | 1.440496  | -1.480717 | -2.442627 | H                   | 2.678511  | 0.775128  | -1.347744 |
| C                                         | 0.405201  | -2.200434 | -3.313783 | H                   | 3.383835  | 3.353166  | -0.786266 |
| C                                         | -0.595458 | -2.766108 | -2.303542 | H                   | 3.042759  | 2.835499  | -2.45114  |
| C                                         | -0.01804  | 0.472447  | -1.771804 | H                   | 1.09195   | 4.188479  | -0.509767 |
| O                                         | -1.139814 | 0.527896  | -2.301257 | H                   | 1.486065  | 4.709568  | -2.158251 |
| N                                         | 0.744854  | 1.562495  | -1.611592 | H                   | -0.711303 | 3.093381  | -1.627886 |
| C                                         | 2.061558  | 1.600216  | -0.9832   | H                   | 0.211968  | 2.913518  | -3.134753 |
| C                                         | 2.611844  | 2.962376  | -1.453223 | H                   | 4.607108  | 1.388974  | -0.185618 |
| C                                         | 1.357163  | 3.838804  | -1.512356 | H                   | 6.137426  | 0.204429  | 1.744188  |
| C                                         | 0.280006  | 2.892035  | -2.041447 | H                   | 5.652541  | 1.907246  | 1.891711  |
| C                                         | 1.947452  | 1.567259  | 0.548569  | H                   | 4.262775  | -0.523802 | 3.140052  |
| O                                         | 0.885728  | 1.871979  | 1.115308  | H                   | 4.809536  | 0.935359  | 3.984931  |
| N                                         | 3.05982   | 1.269459  | 1.234342  | H                   | 2.194853  | 0.659696  | 3.064655  |
| C                                         | 4.304386  | 0.765815  | 0.657564  | H                   | 2.993316  | 2.244019  | 3.09929   |
| C                                         | 5.282776  | 0.878258  | 1.841125  | H                   | 5.800053  | -3.187241 | -0.453701 |
| C                                         | 4.394764  | 0.558953  | 3.0478    | H                   | 4.041926  | -3.046823 | -0.703134 |
| C                                         | 3.059984  | 1.223661  | 2.706628  | H                   | 5.165154  | -2.719688 | -2.048233 |
| C                                         | 4.135848  | -0.700456 | 0.220173  | H                   | 6.494125  | -0.730094 | -2.036523 |
| O                                         | 3.160077  | -1.352992 | 0.626217  | H                   | 6.285667  | 0.509743  | -0.791513 |
| N                                         | 5.070506  | -1.221059 | -0.59489  | H                   | 7.153191  | -0.991527 | -0.406509 |
| C                                         | 6.317541  | -0.562486 | -0.970553 |                     |           |           |           |
| C                                         | 5.010412  | -2.629311 | -0.969413 | (1b) PPII structure |           |           |           |
| H                                         | -5.904054 | -2.112582 | -1.482679 |                     |           |           |           |



|   |           |           |           |                     |           |           |           |
|---|-----------|-----------|-----------|---------------------|-----------|-----------|-----------|
| N | 2.226642  | -1.463603 | -1.498937 | H                   | -1.560447 | 5.075425  | 1.130741  |
| C | 1.04121   | -1.28668  | -0.66264  | H                   | 2.798635  | 0.192613  | 0.479139  |
| C | -0.009094 | -2.147643 | -1.38577  | H                   | 1.912873  | 1.443647  | -1.782891 |
| C | 0.817863  | -3.307376 | -1.952124 | H                   | 2.379682  | 2.36366   | -0.339457 |
| C | 2.146133  | -2.661255 | -2.352939 | H                   | 6.055971  | 1.821858  | -1.423146 |
| C | 1.286309  | -1.846616 | 0.74009   | H                   | 5.296775  | 2.893867  | -0.231945 |
| O | 2.145046  | -2.714002 | 0.955348  | H                   | 4.11408   | 1.762798  | -2.797396 |
| N | 0.514243  | -1.391146 | 1.736211  | H                   | 3.81381   | 3.350565  | -2.070449 |
| N | -0.480034 | -0.411292 | 1.560917  | H                   | 5.802385  | -1.363676 | 2.087594  |
| C | -1.49583  | -0.798248 | 2.579686  | H                   | 4.743356  | -1.764431 | 0.714084  |
| C | -0.647532 | -1.256621 | 3.769639  | H                   | 4.133166  | -0.737853 | 2.021001  |
| C | 0.550197  | -1.938441 | 3.102659  | H                   | -1.73078  | -0.004007 | -3.05096  |
| C | 0.057916  | 0.909535  | 1.719156  | H                   | -2.508407 | 1.534397  | -3.471226 |
| O | 1.234443  | 1.101002  | 2.034483  | H                   | -4.497454 | 1.440445  | -0.354101 |
| N | -0.814993 | 1.905505  | 1.473737  | H                   | -3.80639  | -1.197339 | -3.073488 |
| C | -2.054789 | 1.768796  | 0.71114   | H                   | -4.204705 | 0.026787  | -4.29461  |
| C | -2.63409  | 3.195743  | 0.776934  | H                   | -5.823221 | -0.163477 | -2.141629 |
| C | -1.385685 | 4.079367  | 0.71919   | H                   | -5.265874 | 1.458646  | -2.602136 |
| C | -0.343345 | 3.304323  | 1.527718  | H                   | -6.82603  | -0.14088  | 1.591016  |
| C | -1.758103 | 1.375648  | -0.741798 | H                   | -6.327835 | 0.756627  | 0.152557  |
| O | -0.627451 | 1.540359  | -1.22661  | H                   | -7.165599 | -0.799736 | -0.0254   |
| N | -2.787866 | 0.931558  | -1.475027 | H                   | -5.471167 | -3.046838 | 0.501353  |
| C | -4.125353 | 0.621691  | -0.972958 | H                   | -4.267022 | -2.520418 | 1.703261  |
| C | -4.940173 | 0.46682   | -2.273071 | H                   | -5.998927 | -2.259528 | 2.010777  |
| C | -3.920399 | -0.123045 | -3.251138 |                     |           |           |           |
| C | -2.624907 | 0.605513  | -2.901365 |                     |           |           |           |
| C | -4.115892 | -0.693386 | -0.180873 |                     |           |           |           |
| O | -3.161557 | -1.478758 | -0.290007 |                     |           |           |           |
| N | -5.166903 | -0.957535 | 0.619576  |                     |           |           |           |
| C | -6.438691 | -0.240138 | 0.57451   |                     |           |           |           |
| C | -5.224952 | -2.277163 | 1.242043  |                     |           |           |           |
| H | 1.504284  | -1.701779 | 3.581634  |                     |           |           |           |
| H | 0.439776  | -3.024715 | 3.045241  |                     |           |           |           |
| H | -2.142961 | 0.042833  | 2.821831  |                     |           |           |           |
| H | -2.092216 | -1.61271  | 2.160742  |                     |           |           |           |
| H | -0.32168  | -0.386274 | 4.34675   |                     |           |           |           |
| H | -1.19472  | -1.933102 | 4.428284  |                     |           |           |           |
| H | 0.741987  | -0.237742 | -0.626664 |                     |           |           |           |
| H | -0.807877 | -2.473083 | -0.71633  |                     |           |           |           |
| H | -0.449718 | -1.552399 | -2.191993 |                     |           |           |           |
| H | 3.009225  | -3.306993 | -2.169064 |                     |           |           |           |
| H | 2.158947  | -2.357598 | -3.404853 |                     |           |           |           |
| H | 0.984986  | -4.062861 | -1.178909 |                     |           |           |           |
| H | 0.328501  | -3.790905 | -2.799976 |                     |           |           |           |
| H | -2.731817 | 1.048494  | 1.172139  |                     |           |           |           |
| H | 0.660007  | 3.377049  | 1.100476  |                     |           |           |           |
| H | -0.300595 | 3.629486  | 2.571926  |                     |           |           |           |
| H | -3.342084 | 3.39963   | -0.029569 |                     |           |           |           |
| H | -3.152696 | 3.314669  | 1.733272  |                     |           |           |           |
| H | -1.050766 | 4.189442  | -0.316649 |                     |           |           |           |
|   |           |           |           | (2b) PPII structure |           |           |           |
|   |           |           |           | C                   | 8.805839  | 0.676808  | -1.685465 |
|   |           |           |           | C                   | 7.805945  | -0.116336 | -0.888595 |
|   |           |           |           | O                   | 7.529374  | -1.299772 | -1.168936 |
|   |           |           |           | N                   | 7.212829  | 0.504824  | 0.144445  |
|   |           |           |           | C                   | 6.163703  | -0.164159 | 0.903253  |
|   |           |           |           | C                   | 5.817163  | 0.862318  | 1.998641  |
|   |           |           |           | C                   | 6.090919  | 2.207083  | 1.318601  |
|   |           |           |           | C                   | 7.33733   | 1.935451  | 0.476125  |
|   |           |           |           | C                   | 4.953036  | -0.442659 | 0.015164  |
|   |           |           |           | O                   | 4.708143  | 0.247314  | -0.988528 |
|   |           |           |           | N                   | 4.150092  | -1.449663 | 0.390394  |
|   |           |           |           | C                   | 2.900338  | -1.671707 | -0.326768 |
|   |           |           |           | C                   | 2.305379  | -2.905135 | 0.376408  |
|   |           |           |           | C                   | 2.814733  | -2.767951 | 1.813981  |
|   |           |           |           | C                   | 4.23424   | -2.224392 | 1.644581  |
|   |           |           |           | C                   | 1.987844  | -0.455875 | -0.167194 |
|   |           |           |           | O                   | 2.044115  | 0.277583  | 0.830095  |
|   |           |           |           | N                   | 1.097999  | -0.272995 | -1.154417 |
|   |           |           |           | N                   | 0.151077  | 0.764766  | -1.036599 |
|   |           |           |           | C                   | -0.409368 | 0.88094   | -2.408734 |
|   |           |           |           | C                   | -0.432414 | -0.561171 | -2.913362 |
|   |           |           |           | C                   | 0.84424   | -1.153247 | -2.315567 |
|   |           |           |           | C                   | -0.832095 | 0.452229  | -0.041838 |



|   |           |           |           |                     |           |           |           |
|---|-----------|-----------|-----------|---------------------|-----------|-----------|-----------|
| C | -4.391604 | 0.070732  | 3.064311  |                     |           |           |           |
| C | -3.045327 | -0.629252 | 2.871584  | (3b) PPII structure |           |           |           |
| C | -4.172774 | 0.682822  | 0.009332  |                     |           |           |           |
| O | -3.222903 | 1.446622  | 0.249299  | C                   | -9.024529 | 0.477098  | 0.954106  |
| N | -5.118128 | 0.966735  | -0.904385 | C                   | -7.887048 | -0.138849 | 0.185072  |
| C | -6.343744 | 0.201041  | -1.109617 | O                   | -7.682306 | -1.369187 | 0.183738  |
| C | -5.10246  | 2.252683  | -1.593247 | N                   | -7.088908 | 0.693378  | -0.504254 |
| H | -1.170616 | 0.641378  | -0.381472 | C                   | -5.913574 | 0.180232  | -1.195583 |
| H | 1.429048  | 2.377622  | -3.031192 | C                   | -5.346337 | 1.431804  | -1.893619 |
| H | 0.149393  | 3.459974  | -2.424092 | C                   | -5.734757 | 2.567742  | -0.94212  |
| H | -2.153847 | 1.685917  | -2.053323 | C                   | -7.126213 | 2.165917  | -0.451303 |
| H | -0.13225  | 0.877321  | -4.013258 | C                   | -4.903402 | -0.383867 | -0.196435 |
| H | -1.198719 | 2.294061  | -4.059288 | O                   | -4.86298  | 0.009832  | 0.981276  |
| H | 0.890015  | 0.073566  | 0.714299  | N                   | -4.038535 | -1.295855 | -0.664794 |
| H | -0.737269 | 2.134626  | 1.407553  | C                   | -2.945119 | -1.753891 | 0.184685  |
| H | -0.171146 | 0.968582  | 2.626428  | C                   | -2.233408 | -2.800361 | -0.694028 |
| H | 3.178771  | 2.879594  | 2.656293  | C                   | -2.462505 | -2.276214 | -2.114306 |
| H | 2.474454  | 1.676387  | 3.755778  | C                   | -3.887783 | -1.725151 | -2.069977 |
| H | 1.047464  | 3.71071   | 2.001108  | C                   | -2.006516 | -0.593617 | 0.511826  |
| H | 0.550349  | 3.104736  | 3.589717  | O                   | -1.913959 | 0.401653  | -0.225184 |
| H | -2.676006 | -1.024749 | -1.163719 | N                   | -1.257679 | -0.715319 | 1.616903  |
| H | 0.758367  | -3.296845 | -1.154568 | C                   | -0.189413 | 0.254294  | 1.878815  |
| H | -0.242594 | -3.357968 | -2.621292 | N                   | 0.441792  | -0.190784 | 3.113474  |
| H | -3.305793 | -3.483425 | -0.125029 | C                   | 0.261123  | -1.654134 | 3.111772  |
| H | -3.024376 | -3.252125 | -1.86322  | C                   | -1.112045 | -1.900455 | 2.476208  |
| H | -0.982268 | -4.197498 | 0.218949  | C                   | 0.82972   | 0.215331  | 0.730629  |
| H | -1.410676 | -5.011004 | -1.297914 | O                   | 1.019544  | -0.826398 | 0.081489  |
| H | 2.8473    | -0.090279 | -0.571147 | N                   | 1.512188  | 1.339294  | 0.487311  |
| H | 2.118891  | -1.754095 | 1.46519   | C                   | 2.566784  | 1.335535  | -0.521562 |
| H | 2.538332  | -2.392127 | -0.138337 | C                   | 3.031727  | 2.804154  | -0.549591 |
| H | 6.247102  | -1.942473 | 0.805484  | C                   | 2.784676  | 3.276436  | 0.885874  |
| H | 5.423752  | -2.824488 | -0.495896 | C                   | 1.472766  | 2.592069  | 1.268407  |
| H | 4.395045  | -2.155442 | 2.290429  | C                   | 3.707716  | 0.409882  | -0.099252 |
| H | 4.076904  | -3.614271 | 1.335844  | O                   | 3.925241  | 0.151414  | 1.096406  |
| H | 5.700822  | 1.761945  | -2.119971 | N                   | 4.477619  | -0.076997 | -1.082118 |
| H | 4.766225  | 1.914203  | -0.611805 | C                   | 5.678138  | -0.837836 | -0.755483 |
| H | 4.04166   | 1.115556  | -2.016002 | C                   | 6.16949   | -1.31014  | -2.135087 |
| H | -2.1916   | 0.01112   | 3.107102  | C                   | 5.75967   | -0.158472 | -3.057486 |
| H | -2.967026 | -1.546797 | 3.464953  | C                   | 4.396786  | 0.274107  | -2.514186 |
| H | -4.580697 | -1.457183 | 0.099688  | C                   | 6.71      | 0.074171  | -0.077136 |
| H | -4.277955 | 1.149534  | 2.91814   | O                   | 6.605653  | 1.309704  | -0.158604 |
| H | -4.801514 | -0.099532 | 4.061776  | N                   | 7.725734  | -0.505908 | 0.587977  |
| H | -6.140581 | 0.096934  | 1.720322  | C                   | 8.06921   | -1.922761 | 0.508809  |
| H | -5.617677 | -1.52179  | 2.233143  | C                   | 8.773097  | 0.361851  | 1.118377  |
| H | -6.528983 | 0.11859   | -2.183868 | H                   | -0.601904 | 1.25792   | 1.989286  |
| H | -6.273453 | -0.802445 | -0.696685 | H                   | -1.134959 | -2.823388 | 1.893334  |
| H | -7.191721 | 0.717974  | -0.647036 | H                   | -1.909271 | -1.923885 | 3.22588   |
| H | -5.886751 | 2.904789  | -1.192166 | H                   | -0.106619 | 0.194442  | 3.882553  |
| H | -4.136748 | 2.737122  | -1.4648   | H                   | 1.046714  | -2.111375 | 2.505857  |
| H | -5.292251 | 2.088618  | -2.65733  | H                   | 0.329133  | -2.042778 | 4.127622  |



|   |           |           |           |   |           |           |           |
|---|-----------|-----------|-----------|---|-----------|-----------|-----------|
| H | -3.338338 | -2.180646 | 1.110829  | C | -3.541689 | -0.503803 | 1.415308  |
| H | -1.17486  | -2.905056 | -0.441906 | O | -4.592034 | -0.672936 | 2.054852  |
| H | -2.723286 | -3.768834 | -0.554104 | N | -2.406118 | -1.141772 | 1.734306  |
| H | -4.029773 | -0.885896 | -2.753802 | C | -1.171124 | -1.095643 | 0.960108  |
| H | -4.62703  | -2.499774 | -2.300957 | C | -0.155725 | -1.72737  | 1.929144  |
| H | -1.757411 | -1.46883  | -2.335896 | C | -0.985286 | -2.799576 | 2.643214  |
| H | -2.350404 | -3.053    | -2.873444 | C | -2.365024 | -2.153425 | 2.8036    |
| H | -6.20552  | -0.598336 | -1.904427 | C | -1.3082   | -1.93707  | -0.314362 |
| H | -4.268189 | 1.362234  | -2.061406 | O | -2.1624   | -2.832456 | -0.406014 |
| H | -5.843135 | 1.550883  | -2.861509 | N | -0.442469 | -1.68737  | -1.303757 |
| H | -7.329716 | 2.509103  | 0.565389  | C | 0.583345  | -0.659381 | -1.330635 |
| H | -7.912157 | 2.543295  | -1.114988 | C | 1.430786  | -1.145897 | -2.532661 |
| H | -5.038056 | 2.606869  | -0.098841 | N | 0.465088  | -1.762248 | -3.447538 |
| H | -5.740828 | 3.543596  | -1.432077 | C | -0.46646  | -2.450972 | -2.570862 |
| H | -9.715409 | -0.309449 | 1.258903  | C | -0.021275 | 0.720613  | -1.61105  |
| H | -9.5534   | 1.226073  | 0.358323  | O | -1.140566 | 0.830942  | -2.136795 |
| H | -8.632284 | 0.973723  | 1.848813  | N | 0.737105  | 1.784611  | -1.315139 |
| H | 1.40675   | 2.381995  | 2.336948  | C | 2.056687  | 1.738898  | -0.689901 |
| H | 0.604614  | 3.188211  | 0.966825  | C | 2.58092   | 3.171824  | -0.913938 |
| H | 2.160122  | 1.006778  | -1.481059 | C | 1.308442  | 4.020346  | -0.849931 |
| H | 3.590242  | 2.929597  | 1.540696  | C | 0.267522  | 3.15834   | -1.561719 |
| H | 2.714442  | 4.363056  | 0.966567  | C | 1.949381  | 1.423878  | 0.809886  |
| H | 4.075385  | 2.90206   | -0.859727 | O | 0.890473  | 1.613798  | 1.429781  |
| H | 2.404402  | 3.360013  | -1.253189 | N | 3.060795  | 0.987075  | 1.416071  |
| H | 4.218477  | 1.343645  | -2.646544 | C | 4.320587  | 0.662574  | 0.751855  |
| H | 3.579397  | -0.28227  | -2.985338 | C | 5.303167  | 0.585991  | 1.934548  |
| H | 5.412547  | -1.663889 | -0.093637 | C | 4.441938  | 0.002405  | 3.05948   |
| H | 6.474503  | 0.665835  | -2.969233 | C | 3.071721  | 0.651667  | 2.849475  |
| H | 5.702714  | -0.455847 | -4.106477 | C | 4.217954  | -0.697278 | 0.039735  |
| H | 7.243422  | -1.511232 | -2.15217  | O | 3.307839  | -1.484133 | 0.347931  |
| H | 5.639258  | -2.229418 | -2.403223 | N | 5.139736  | -0.98585  | -0.897728 |
| H | 8.373723  | -2.268505 | 1.499387  | C | 6.346203  | -0.203924 | -1.151885 |
| H | 7.225198  | -2.525401 | 0.180159  | C | 5.158579  | -2.310994 | -1.506816 |
| H | 8.902759  | -2.070843 | -0.187102 | H | 1.172235  | -0.66508  | -0.409998 |
| H | 9.413601  | 0.74046   | 0.313605  | H | -1.472446 | -2.469992 | -2.993147 |
| H | 8.330559  | 1.207039  | 1.646487  | H | -0.136445 | -3.474353 | -2.36917  |
| H | 9.380042  | -0.218206 | 1.814577  | H | 1.986749  | -0.347137 | -3.024978 |
|   |           |           |           | H | 2.13378   | -1.903637 | -2.174968 |
|   |           |           |           | H | -0.045631 | -1.007986 | -3.908132 |
|   |           |           |           | H | -0.901702 | -0.063648 | 0.718634  |
|   |           |           |           | H | 0.724612  | -2.122831 | 1.414458  |
|   |           |           |           | H | 0.166528  | -0.953379 | 2.63301   |
| C | -4.995259 | -1.254935 | -1.451672 | H | -3.187018 | -2.863341 | 2.675572  |
| C | -5.570258 | 0.061613  | -0.995776 | H | -2.481733 | -1.659635 | 3.7738    |
| O | -6.71882  | 0.421725  | -1.320376 | H | -1.057167 | -3.696283 | 2.020699  |
| N | -4.794185 | 0.847366  | -0.230018 | H | -0.55585  | -3.084878 | 3.605684  |
| C | -3.466117 | 0.498008  | 0.256046  | H | 2.689732  | 1.003818  | -1.194116 |
| C | -2.926141 | 1.858445  | 0.737646  | H | -0.742351 | 3.285689  | -1.16448  |
| C | -4.179222 | 2.543393  | 1.293128  | H | 0.244125  | 3.345958  | -2.640976 |
| C | -5.287669 | 2.116255  | 0.327523  | H | 3.332456  | 3.460939  | -0.175557 |

(4) Ac-Pro<sub>2</sub>-γ-azPro(d)-Pro<sub>2</sub>-NMe<sub>2</sub>

(4a) PPI structure

|                     |           |           |           |   |           |           |           |
|---------------------|-----------|-----------|-----------|---|-----------|-----------|-----------|
| H                   | 3.031012  | 3.225689  | -1.910053 | C | -1.056512 | -1.483454 | 2.599166  |
| H                   | 1.014247  | 4.182001  | 0.191915  | C | 0.832028  | 0.368562  | 0.504847  |
| H                   | 1.431249  | 4.993641  | -1.329059 | O | 1.034863  | -0.750267 | 0.003842  |
| H                   | -2.859444 | 0.097045  | -0.559978 | N | 1.512956  | 1.455519  | 0.114653  |
| H                   | -2.12157  | 1.76426   | 1.471182  | C | 2.623998  | 1.303824  | -0.81993  |
| H                   | -2.54129  | 2.399706  | -0.133181 | C | 3.116498  | 2.749437  | -1.012914 |
| H                   | -6.250254 | 1.960259  | 0.822368  | C | 2.832076  | 3.398464  | 0.345228  |
| H                   | -5.429976 | 2.838949  | -0.483264 | C | 1.502657  | 2.77767   | 0.776181  |
| H                   | -4.393349 | 2.17297   | 2.300677  | C | 3.719743  | 0.435713  | -0.200715 |
| H                   | -4.074838 | 3.629183  | 1.342326  | O | 3.872816  | 0.372228  | 1.030925  |
| H                   | -5.719946 | -1.749958 | -2.098891 | N | 4.515406  | -0.226705 | -1.050865 |
| H                   | -4.781288 | -1.901098 | -0.593195 | C | 5.677323  | -0.948847 | -0.546218 |
| H                   | -4.059144 | -1.106917 | -2.001252 | C | 6.213444  | -1.65367  | -1.804595 |
| H                   | 2.240184  | -0.018928 | 3.082457  | C | 5.880562  | -0.661695 | -2.923113 |
| H                   | 2.953436  | 1.569865  | 3.434861  | C | 4.512366  | -0.107058 | -2.522944 |
| H                   | 4.586685  | 1.454902  | 0.05112   | C | 6.706251  | 0.038314  | 0.02209   |
| H                   | 4.363795  | -1.083462 | 2.949308  | O | 6.652735  | 1.243445  | -0.277605 |
| H                   | 4.847224  | 0.218166  | 4.050049  | N | 7.664834  | -0.444949 | 0.833125  |
| H                   | 6.184534  | -0.018662 | 1.706503  | C | 7.955134  | -1.862737 | 1.025908  |
| H                   | 5.629013  | 1.601294  | 2.181572  | C | 8.718068  | 0.471584  | 1.259502  |
| H                   | 6.50865   | -0.149574 | -2.231572 | H | -0.604786 | 1.555932  | 1.620029  |
| H                   | 6.267626  | 0.80908   | -0.76461  | H | -1.146146 | -2.491717 | 2.195453  |
| H                   | 7.212759  | -0.692682 | -0.692593 | H | -1.809877 | -1.327477 | 3.376188  |
| H                   | 5.935716  | -2.929339 | -1.042759 | H | 1.526942  | 0.448963  | 3.04062   |
| H                   | 4.192729  | -2.796294 | -1.383512 | H | -0.065015 | 0.71094   | 3.79126   |
| H                   | 5.380069  | -2.206438 | -2.572089 | H | 0.934875  | -1.71181  | 2.498162  |
|                     |           |           |           | H | -3.296633 | -1.997536 | 1.365931  |
| (4b) PPII structure |           |           |           | H | -1.220237 | -2.978463 | -0.158585 |
|                     |           |           |           | H | -2.776547 | -3.830452 | -0.059095 |
| C                   | -8.961246 | 0.625831  | 1.139054  | H | -4.169222 | -1.290998 | -2.608537 |
| C                   | -7.871041 | -0.099214 | 0.397527  | H | -4.763476 | -2.813068 | -1.9034   |
| O                   | -7.662397 | -1.318251 | 0.560603  | H | -1.887696 | -1.857296 | -2.229291 |
| N                   | -7.121722 | 0.620911  | -0.453774 | H | -2.52686  | -3.493705 | -2.474843 |
| C                   | -5.985918 | 0.007242  | -1.129176 | H | 2.269041  | 0.852222  | -1.749117 |
| C                   | -5.462482 | 1.142481  | -2.02913  | H | 1.428263  | 2.672617  | 1.860958  |
| C                   | -5.792541 | 2.403751  | -1.225075 | H | 0.648282  | 3.361853  | 0.41839   |
| C                   | -7.152297 | 2.08733   | -0.600734 | H | 4.171263  | 2.792548  | -1.297161 |
| C                   | -4.923493 | -0.412991 | -0.114556 | H | 2.522937  | 3.222582  | -1.801283 |
| O                   | -4.816637 | 0.152474  | 0.986523  | H | 3.617222  | 3.134201  | 1.060201  |
| N                   | -4.090356 | -1.397581 | -0.483923 | H | 2.770108  | 4.487114  | 0.286659  |
| C                   | -2.951347 | -1.724395 | 0.365417  | H | -6.314675 | -0.86386  | -1.701322 |
| C                   | -2.289728 | -2.901909 | -0.37293  | H | -4.396281 | 1.041119  | -2.249572 |
| C                   | -2.589371 | -2.603899 | -1.844889 | H | -6.017696 | 1.128477  | -2.972196 |
| C                   | -4.005844 | -2.026631 | -1.818086 | H | -7.290415 | 2.567649  | 0.370467  |
| C                   | -2.004221 | -0.527369 | 0.45317   | H | -7.977242 | 2.378592  | -1.260345 |
| O                   | -1.945094 | 0.322844  | -0.449306 | H | -5.046227 | 2.553934  | -0.438631 |
| N                   | -1.227559 | -0.45334  | 1.543753  | H | -5.826169 | 3.301952  | -1.84527  |
| C                   | -0.179185 | 0.550275  | 1.632772  | H | -9.638851 | -0.105288 | 1.581244  |
| C                   | 0.467915  | 0.191413  | 2.99085   | H | -9.518897 | 1.297119  | 0.48005   |
| N                   | 0.275017  | -1.256549 | 3.131053  | H | -8.51763  | 1.229647  | 1.939034  |

|   |          |           |           |
|---|----------|-----------|-----------|
| H | 4.37931  | 0.93278   | -2.83105  |
| H | 3.696212 | -0.707092 | -2.93949  |
| H | 5.357545 | -1.64755  | 0.228662  |
| H | 6.619206 | 0.145875  | -2.942845 |
| H | 5.855448 | -1.129874 | -3.909263 |
| H | 7.280419 | -1.880315 | -1.736942 |
| H | 5.667217 | -2.592044 | -1.943277 |
| H | 8.177423 | -2.038716 | 2.081108  |
| H | 7.11207  | -2.490637 | 0.746003  |
| H | 8.827021 | -2.154485 | 0.429633  |
| H | 9.407378 | 0.686535  | 0.434942  |
| H | 8.283692 | 1.407217  | 1.613487  |
| H | 9.271371 | 0.00347   | 2.074768  |

(5) Ac-Pro<sub>2</sub>- $\delta$ -azPro(d)-Pro<sub>2</sub>-NMe<sub>2</sub>

## (5a) PPI structure

|   |           |           |           |
|---|-----------|-----------|-----------|
| C | -4.942321 | -1.135307 | -1.413321 |
| C | -5.476424 | 0.178542  | -0.902734 |
| O | -6.612666 | 0.588802  | -1.210811 |
| N | -4.675178 | 0.904694  | -0.104968 |
| C | -3.352855 | 0.495283  | 0.347809  |
| C | -2.767565 | 1.811114  | 0.895261  |
| C | -3.99646  | 2.515656  | 1.481056  |
| C | -5.123958 | 2.164401  | 0.507111  |
| C | -3.43625  | -0.556908 | 1.45803   |
| O | -4.46772  | -0.705462 | 2.133241  |
| N | -2.324747 | -1.267059 | 1.69541   |
| C | -1.102835 | -1.221234 | 0.898994  |
| C | -0.083428 | -1.918781 | 1.817542  |
| C | -0.928694 | -2.983433 | 2.525074  |
| C | -2.277694 | -2.294811 | 2.747859  |
| C | -1.292983 | -2.005281 | -0.406191 |
| O | -2.163171 | -2.885507 | -0.519304 |
| N | -0.456808 | -1.706992 | -1.402292 |
| C | 0.559789  | -0.666834 | -1.43085  |
| C | 1.41821   | -1.108453 | -2.631542 |
| C | 0.373414  | -1.7276   | -3.550447 |
| N | -0.521327 | -2.45155  | -2.623301 |
| C | -0.071216 | 0.70941   | -1.685072 |
| O | -1.20391  | 0.81103   | -2.180971 |
| N | 0.686831  | 1.776501  | -1.40268  |
| C | 1.999234  | 1.741048  | -0.762504 |
| C | 2.531805  | 3.163619  | -1.024741 |
| C | 1.263982  | 4.020108  | -0.972409 |
| C | 0.212246  | 3.147554  | -1.656266 |
| C | 1.865636  | 1.467775  | 0.744205  |
| O | 0.784497  | 1.634564  | 1.330522  |
| N | 2.977099  | 1.095919  | 1.392134  |

|   |           |           |           |
|---|-----------|-----------|-----------|
| C | 4.243464  | 0.730718  | 0.763989  |
| C | 5.203552  | 0.701567  | 1.966725  |
| C | 4.321682  | 0.155589  | 3.094481  |
| C | 2.950793  | 0.784762  | 2.831544  |
| C | 4.130987  | -0.661996 | 0.118622  |
| O | 3.17778   | -1.400584 | 0.416286  |
| N | 5.087607  | -1.03322  | -0.751815 |
| C | 6.328     | -0.30156  | -0.98988  |
| C | 5.091941  | -2.400243 | -1.262025 |
| H | -5.691003 | -1.593676 | -2.060176 |
| H | -4.723113 | -1.812499 | -0.580347 |
| H | -4.01484  | -0.988504 | -1.978431 |
| H | -2.767595 | 0.120287  | -0.495165 |
| H | -1.974619 | 1.646125  | 1.628757  |
| H | -2.354354 | 2.37884   | 0.054704  |
| H | -4.218566 | 2.114044  | 2.474665  |
| H | -3.855064 | 3.594575  | 1.571975  |
| H | -6.087831 | 2.018283  | 1.002496  |
| H | -5.249287 | 2.923967  | -0.272052 |
| H | -0.811948 | -0.186347 | 0.697538  |
| H | 0.763795  | -2.329579 | 1.262156  |
| H | 0.293538  | -1.181392 | 2.534043  |
| H | -1.05406  | -3.855898 | 1.876968  |
| H | -0.481804 | -3.315089 | 3.464454  |
| H | -3.127808 | -2.974771 | 2.644374  |
| H | -2.339941 | -1.809417 | 3.72774   |
| H | 1.139235  | -0.682335 | -0.504401 |
| H | 1.95352   | -0.2807   | -3.100548 |
| H | 2.140935  | -1.857559 | -2.294059 |
| H | -0.165595 | -0.948886 | -4.100404 |
| H | 0.803708  | -2.433819 | -4.261031 |
| H | -1.489117 | -2.378962 | -2.94582  |
| H | 2.634054  | 0.986142  | -1.23472  |
| H | 3.290706  | 3.468215  | -0.30043  |
| H | 2.973642  | 3.188366  | -2.025815 |
| H | 0.979363  | 4.208522  | 0.06767   |
| H | 1.387931  | 4.981218  | -1.47519  |
| H | -0.791097 | 3.281097  | -1.245403 |
| H | 0.171094  | 3.320193  | -2.737397 |
| H | 4.530495  | 1.482237  | 0.026517  |
| H | 6.091665  | 0.092694  | 1.781416  |
| H | 5.52067   | 1.726875  | 2.181845  |
| H | 4.254749  | -0.934522 | 3.025211  |
| H | 4.704437  | 0.412959  | 4.084043  |
| H | 2.120857  | 0.107639  | 3.051434  |
| H | 2.802179  | 1.710228  | 3.397593  |
| H | 5.707262  | -3.044139 | -0.622819 |
| H | 4.077309  | -2.793096 | -1.297212 |
| H | 5.512898  | -2.394891 | -2.269911 |
| H | 6.529592  | -0.290552 | -2.064114 |

|   |          |           |           |
|---|----------|-----------|-----------|
| H | 6.268306 | 0.726105  | -0.639278 |
| H | 7.16055  | -0.801016 | -0.48193  |

## (5b) PPII structure

|   |           |           |           |
|---|-----------|-----------|-----------|
| C | 9.089672  | 0.25613   | 0.536793  |
| C | 7.850374  | -0.009993 | -0.274098 |
| O | 7.58226   | 0.646295  | -1.300275 |
| N | 7.033953  | -0.9886   | 0.151776  |
| C | 5.763337  | -1.226429 | -0.520911 |
| C | 5.1778    | -2.423263 | 0.252161  |
| C | 5.725436  | -2.226623 | 1.669273  |
| C | 7.142374  | -1.699423 | 1.438611  |
| C | 4.857117  | -0.002638 | -0.397111 |
| O | 4.97598   | 0.801634  | 0.542994  |
| N | 3.909119  | 0.137522  | -1.334001 |
| C | 2.91903   | 1.200103  | -1.21626  |
| C | 2.12971   | 1.086607  | -2.531837 |
| C | 2.171723  | -0.415683 | -2.8262   |
| C | 3.583861  | -0.826817 | -2.404372 |
| C | 2.000889  | 0.92625   | -0.025755 |
| O | 1.919923  | -0.19007  | 0.506371  |
| N | 1.248785  | 1.951265  | 0.411651  |
| C | 0.09087   | 1.725591  | 1.281718  |
| C | -0.639061 | 3.081162  | 1.22032   |
| C | -0.182095 | 3.624731  | -0.136549 |
| N | 1.228969  | 3.217773  | -0.242372 |
| C | -0.802186 | 0.631481  | 0.695531  |
| O | -0.882894 | 0.453869  | -0.53066  |
| N | -1.523529 | -0.089024 | 1.564454  |
| C | -2.510956 | -1.035395 | 1.058408  |
| C | -3.054085 | -1.687911 | 2.342291  |
| C | -2.970184 | -0.554806 | 3.36962   |
| C | -1.670515 | 0.169863  | 3.011651  |
| C | -3.62346  | -0.294972 | 0.316305  |
| O | -3.8916   | 0.890935  | 0.573032  |
| N | -4.310148 | -0.999236 | -0.594031 |
| C | -5.509753 | -0.430895 | -1.200779 |
| C | -5.905855 | -1.498234 | -2.235936 |
| C | -5.473673 | -2.804466 | -1.564061 |
| C | -4.156075 | -2.440143 | -0.879263 |
| C | -6.599469 | -0.249756 | -0.133673 |
| O | -6.517597 | -0.84669  | 0.953909  |
| N | -7.637193 | 0.556592  | -0.418218 |
| C | -7.932821 | 1.112432  | -1.735723 |
| C | -8.720815 | 0.643751  | 0.555917  |
| H | 9.773321  | 0.870559  | -0.050033 |
| H | 9.585518  | -0.672094 | 0.833699  |
| H | 8.817774  | 0.79967   | 1.44896   |
| H | 5.933784  | -1.454426 | -1.576032 |

|   |           |           |           |
|---|-----------|-----------|-----------|
| H | 4.085294  | -2.447806 | 0.213173  |
| H | 5.563437  | -3.349074 | -0.186106 |
| H | 5.130457  | -1.478559 | 2.202517  |
| H | 5.722809  | -3.149833 | 2.252563  |
| H | 7.470449  | -1.018542 | 2.227283  |
| H | 7.86843   | -2.515556 | 1.354017  |
| H | 3.409962  | 2.166184  | -1.097082 |
| H | 1.115879  | 1.483372  | -2.439226 |
| H | 2.656788  | 1.64895   | -3.308926 |
| H | 1.430856  | -0.938991 | -2.212165 |
| H | 1.97746   | -0.647826 | -3.875293 |
| H | 3.625543  | -1.853178 | -2.032341 |
| H | 4.296943  | -0.719441 | -3.228876 |
| H | 0.417093  | 1.46175   | 2.289496  |
| H | -1.723917 | 2.970726  | 1.29919   |
| H | -0.285934 | 3.72644   | 2.029778  |
| H | -0.743295 | 3.167043  | -0.955747 |
| H | -0.249825 | 4.710527  | -0.215821 |
| H | 1.771834  | 3.845892  | 0.355104  |
| H | -2.030889 | -1.754337 | 0.390771  |
| H | -4.067702 | -2.077106 | 2.214427  |
| H | -2.395229 | -2.515851 | 2.622265  |
| H | -3.821298 | 0.123285  | 3.25303   |
| H | -2.958735 | -0.919969 | 4.398591  |
| H | -1.727091 | 1.242899  | 3.209515  |
| H | -0.81361  | -0.247323 | 3.55093   |
| H | -5.262993 | 0.530362  | -1.65514  |
| H | -6.970795 | -1.474922 | -2.479584 |
| H | -5.336454 | -1.326449 | -3.15497  |
| H | -6.212994 | -3.102534 | -0.813525 |
| H | -5.350603 | -3.625097 | -2.273731 |
| H | -3.994865 | -3.007834 | 0.039958  |
| H | -3.299827 | -2.594074 | -1.544899 |
| H | -9.323726 | -0.271269 | 0.553992  |
| H | -8.316283 | 0.801734  | 1.556557  |
| H | -9.355355 | 1.489892  | 0.288895  |
| H | -8.194915 | 2.168008  | -1.628187 |
| H | -7.081483 | 1.036697  | -2.408615 |
| H | -8.781208 | 0.582367  | -2.182622 |

(6) Ac-Pro<sub>2</sub>- $\delta$ -azPro(u)-Pro<sub>2</sub>-NMe<sub>2</sub>

## (6a) PPI structure

|   |           |           |           |
|---|-----------|-----------|-----------|
| C | -5.112632 | -1.540014 | -1.084214 |
| C | -5.67233  | -0.162632 | -0.836703 |
| O | -6.856505 | 0.120135  | -1.103775 |
| N | -4.840295 | 0.763929  | -0.330662 |
| C | -3.478239 | 0.507586  | 0.117843  |
| C | -2.928264 | 1.934446  | 0.306691  |

|   |           |           |           |   |           |           |           |
|---|-----------|-----------|-----------|---|-----------|-----------|-----------|
| C | -4.147156 | 2.701639  | 0.828609  | H | 0.210163  | 2.963801  | -3.132857 |
| C | -5.316611 | 2.105524  | 0.040675  | H | 3.328501  | 3.41077   | -0.7197   |
| C | -3.477887 | -0.271203 | 1.440505  | H | 3.02584   | 2.913936  | -2.398197 |
| O | -4.493134 | -0.321708 | 2.152838  | H | 1.022466  | 4.213608  | -0.473826 |
| N | -2.3253   | -0.849219 | 1.809978  | H | 1.440173  | 4.763649  | -2.106721 |
| C | -1.119757 | -0.936105 | 0.991509  | H | -2.921409 | -0.036634 | -0.649815 |
| C | -0.066211 | -1.412122 | 2.009116  | H | -2.064616 | 1.978885  | 0.974919  |
| C | -0.868755 | -2.335644 | 2.932151  | H | -2.626956 | 2.313494  | -0.675141 |
| C | -2.233663 | -1.652112 | 3.041703  | H | -6.23427  | 2.02791   | 0.630277  |
| C | -1.29279  | -1.977946 | -0.123551 | H | -5.538488 | 2.676414  | -0.867328 |
| O | -2.131056 | -2.880352 | -0.023991 | H | -4.279442 | 2.515007  | 1.89907   |
| N | -0.466091 | -1.848219 | -1.177871 | H | -4.058748 | 3.779359  | 0.677171  |
| C | 0.574392  | -0.825367 | -1.349899 | H | -5.887832 | -2.160169 | -1.53532  |
| C | 1.463591  | -1.417827 | -2.470673 | H | -4.788018 | -2.0005   | -0.144824 |
| C | 1.014578  | -2.878972 | -2.518956 | H | -4.247211 | -1.496693 | -1.754014 |
| N | -0.415904 | -2.848906 | -2.181119 | H | 2.114568  | 0.670454  | 3.075627  |
| C | -0.028644 | 0.508223  | -1.792057 | H | 2.940052  | 2.240491  | 3.126252  |
| O | -1.139322 | 0.553535  | -2.343635 | H | 4.584365  | 1.462071  | -0.12391  |
| N | 0.725509  | 1.600571  | -1.614569 | H | 4.166504  | -0.550308 | 3.132683  |
| C | 2.034264  | 1.643642  | -0.96643  | H | 4.712096  | 0.878214  | 4.031235  |
| C | 2.574487  | 3.020079  | -1.407044 | H | 6.075554  | 0.202054  | 1.798834  |
| C | 1.310229  | 3.88186   | -1.476189 | H | 5.599388  | 1.903768  | 1.98175   |
| C | 0.254701  | 2.930323  | -2.038703 | H | 6.493732  | -0.462206 | -2.024919 |
| C | 1.903366  | 1.586939  | 0.562503  | H | 6.349285  | 0.585762  | -0.604536 |
| O | 0.835953  | 1.886525  | 1.121286  | H | 7.173848  | -0.977562 | -0.464721 |
| N | 3.006753  | 1.274102  | 1.256393  | H | 5.600801  | -3.158122 | -0.430031 |
| C | 4.269352  | 0.80378   | 0.688333  | H | 3.975137  | -2.841586 | -1.088971 |
| C | 5.223692  | 0.879303  | 1.895827  | H | 5.415749  | -2.559382 | -2.096145 |
| C | 4.311464  | 0.533295  | 3.075973  |   |           |           |           |
| C | 2.992046  | 1.221086  | 2.728247  |   |           |           |           |
| C | 4.128887  | -0.643911 | 0.186768  |   |           |           |           |
| O | 3.152758  | -1.327458 | 0.538785  | C | -9.004118 | -0.163141 | -1.207524 |
| N | 5.086491  | -1.120842 | -0.626428 | C | -7.896658 | 0.076131  | -0.217309 |
| C | 6.342145  | -0.447907 | -0.942059 | O | -7.734951 | 1.181945  | 0.336324  |
| C | 5.010966  | -2.504099 | -1.082635 | N | -7.080998 | -0.956484 | 0.054086  |
| H | 1.144523  | -0.721658 | -0.422446 | C | -5.932417 | -0.775006 | 0.933039  |
| H | -0.921668 | -2.467692 | -2.986643 | C | -5.320139 | -2.187834 | 1.001083  |
| H | 1.248976  | -0.924581 | -3.424381 | C | -5.654759 | -2.77924  | -0.370987 |
| H | 2.526107  | -1.302984 | -2.244277 | C | -7.05886  | -2.247177 | -0.657736 |
| H | 1.148326  | -3.340948 | -3.497626 | C | -4.941437 | 0.217403  | 0.326489  |
| H | 1.53491   | -3.473054 | -1.762155 | O | -4.871054 | 0.396966  | -0.900876 |
| H | -0.865232 | 0.044957  | 0.581959  | N | -4.131689 | 0.857949  | 1.182621  |
| H | 0.78532   | -1.905212 | 1.534419  | C | -3.050155 | 1.6905    | 0.670273  |
| H | 0.296759  | -0.537257 | 2.558118  | C | -2.432147 | 2.283935  | 1.947941  |
| H | -3.065808 | -2.360107 | 3.085387  | C | -2.632533 | 1.166369  | 2.975284  |
| H | -2.296845 | -0.988732 | 3.910554  | C | -4.013528 | 0.605541  | 2.633278  |
| H | -0.977212 | -3.324663 | 2.47701   | C | -2.039402 | 0.825236  | -0.078526 |
| H | -0.396133 | -2.458496 | 3.908643  | O | -1.973888 | -0.405517 | 0.068269  |
| H | 2.664723  | 0.832145  | -1.338167 | N | -1.179192 | 1.466286  | -0.880609 |
| H | -0.747012 | 3.115285  | -1.643386 | C | -0.100227 | 0.773548  | -1.584908 |

(6b) PPII structure

|   |           |           |           |   |           |           |           |
|---|-----------|-----------|-----------|---|-----------|-----------|-----------|
| C | 0.561896  | 1.909569  | -2.395704 | H | -9.506337 | -1.117735 | -1.027605 |
| C | -0.495618 | 3.019016  | -2.346598 | H | -8.588138 | -0.188797 | -2.221367 |
| N | -1.13455  | 2.87469   | -1.028486 | H | 4.317977  | -2.550341 | 1.624435  |
| C | 0.871935  | 0.166193  | -0.579357 | H | 3.769003  | -1.339953 | 2.807745  |
| O | 1.041532  | 0.691646  | 0.53342   | H | 5.493014  | 1.350764  | 0.997662  |
| N | 1.541852  | -0.927384 | -0.963553 | H | 6.616803  | -2.162006 | 2.100421  |
| C | 2.615104  | -1.446282 | -0.122873 | H | 5.9518    | -1.820492 | 3.709651  |
| C | 3.071387  | -2.703417 | -0.884167 | H | 7.428394  | 0.110235  | 2.526078  |
| C | 2.850294  | -2.32114  | -2.350605 | H | 5.868227  | 0.590191  | 3.225663  |
| C | 1.557357  | -1.503014 | -2.325522 | H | 8.283268  | 2.77087   | -0.278947 |
| C | 3.74914   | -0.424458 | -0.031024 | H | 7.279664  | 2.247354  | 1.079767  |
| O | 3.917686  | 0.432823  | -0.91447  | H | 8.977396  | 1.734528  | 0.989359  |
| N | 4.564049  | -0.521242 | 1.028085  | H | 9.405781  | -0.369887 | -0.907792 |
| C | 5.768937  | 0.299142  | 1.090607  | H | 8.203808  | -0.147017 | -2.203183 |
| C | 6.347792  | -0.044856 | 2.474032  | H | 9.236894  | 1.212251  | -1.708069 |
| C | 5.941618  | -1.509411 | 2.663157  |   |           |           |           |
| C | 4.537152  | -1.574225 | 2.062808  |   |           |           |           |
| C | 6.733477  | -0.101724 | -0.034739 |   |           |           |           |
| O | 6.614833  | -1.204532 | -0.59581  |   |           |           |           |
| N | 7.702156  | 0.766919  | -0.378056 |   |           |           |           |
| C | 8.07516   | 1.943014  | 0.403221  |   |           |           |           |
| C | 8.694664  | 0.333382  | -1.35631  |   |           |           |           |
| H | -0.53118  | 0.001173  | -2.227312 |   |           |           |           |
| H | -0.47086  | 3.214435  | -0.324094 |   |           |           |           |
| H | 1.477445  | 2.243295  | -1.896077 |   |           |           |           |
| H | 0.807163  | 1.594263  | -3.411152 |   |           |           |           |
| H | -0.075358 | 4.021148  | -2.437508 |   |           |           |           |
| H | -1.256729 | 2.87408   | -3.117615 |   |           |           |           |
| H | -3.437222 | 2.456681  | -0.003131 |   |           |           |           |
| H | -1.383116 | 2.563091  | 1.816488  |   |           |           |           |
| H | -2.997986 | 3.177189  | 2.23011   |   |           |           |           |
| H | -4.093913 | -0.461474 | 2.852889  |   |           |           |           |
| H | -4.808503 | 1.137804  | 3.166416  |   |           |           |           |
| H | -1.870134 | 0.391946  | 2.840313  |   |           |           |           |
| H | -2.583439 | 1.524008  | 4.005799  |   |           |           |           |
| H | 2.23381   | -1.673452 | 0.87526   |   |           |           |           |
| H | 1.551812  | -0.713027 | -3.080145 |   |           |           |           |
| H | 0.676795  | -2.137803 | -2.46821  |   |           |           |           |
| H | 4.108408  | -2.9702   | -0.664692 |   |           |           |           |
| H | 2.427155  | -3.540578 | -0.598286 |   |           |           |           |
| H | 3.68035   | -1.703337 | -2.707195 |   |           |           |           |
| H | 2.764266  | -3.192002 | -3.003705 |   |           |           |           |
| H | -6.262075 | -0.415091 | 1.910631  |   |           |           |           |
| H | -4.247242 | -2.166935 | 1.209677  |   |           |           |           |
| H | -5.819552 | -2.74913  | 1.796926  |   |           |           |           |
| H | -7.246243 | -2.101243 | -1.723724 |   |           |           |           |
| H | -7.830554 | -2.91031  | -0.250773 |   |           |           |           |
| H | -4.951938 | -2.406369 | -1.12275  |   |           |           |           |
| H | -5.622069 | -3.870811 | -0.378306 |   |           |           |           |
| H | -9.724789 | 0.652573  | -1.141058 |   |           |           |           |

Cartesian Coordinates of PPI and PPII structures of the collagen model peptide Ac-Hyp-Gly-X-Hyp-Gly-Pro-NMe<sub>2</sub> optimized at the SMD M06-2X/6-31+G(d) level of theory in water:

|                                                     |           |           |           |   |           |           |           |
|-----------------------------------------------------|-----------|-----------|-----------|---|-----------|-----------|-----------|
| (1) Ac-(Hyp-Gly-Pro) <sub>2</sub> -NMe <sub>2</sub> |           |           |           | C | 7.116768  | 1.732991  | 0.461001  |
| (1a) PPI structure                                  |           |           |           | C | 5.450531  | 2.848469  | -0.998073 |
|                                                     |           |           |           | H | -6.125897 | -1.848641 | -0.341654 |
|                                                     |           |           |           | H | -3.715683 | -0.168632 | -0.242987 |
| C                                                   | -6.065224 | -1.256514 | -1.259909 | H | -4.076156 | 1.657788  | 2.168797  |
| C                                                   | -6.369646 | 0.195705  | -0.999194 | H | -2.607176 | 1.415853  | 1.196899  |
| O                                                   | -7.334267 | 0.767616  | -1.539639 | H | -4.078414 | 3.64116   | 0.812012  |
| N                                                   | -5.540928 | 0.866274  | -0.174919 | H | -6.25959  | 2.611374  | 0.798613  |
| C                                                   | -4.37948  | 0.288055  | 0.499185  | H | -5.950987 | 2.786218  | -0.949545 |
| C                                                   | -3.695823 | 1.516011  | 1.151477  | H | -2.821686 | 2.004975  | -1.042483 |
| C                                                   | -4.146773 | 2.687255  | 0.283249  | H | -4.049632 | -2.229945 | 2.701685  |
| O                                                   | -3.386789 | 2.796382  | -0.916969 | H | -1.989187 | -0.673302 | 1.35226   |
| C                                                   | -5.5962   | 2.325424  | -0.026163 | H | -1.838609 | -2.252333 | 2.087904  |
| C                                                   | -4.760117 | -0.727265 | 1.577473  | H | 0.07729   | -1.407226 | 0.497505  |
| O                                                   | -5.891193 | -0.755667 | 2.075752  | H | 1.398221  | -0.860622 | -1.823658 |
| N                                                   | -3.776391 | -1.540177 | 2.008373  | H | 1.218578  | -2.528785 | -1.239657 |
| C                                                   | -2.462098 | -1.655927 | 1.414568  | H | -0.567112 | -1.114419 | -3.292977 |
| C                                                   | -2.491587 | -2.355883 | 0.056186  | H | 0.274441  | -2.661393 | -3.499018 |
| O                                                   | -3.428769 | -3.103564 | -0.258693 | H | -2.36448  | -2.539091 | -2.619046 |
| N                                                   | -1.449255 | -2.142    | -0.758155 | H | -1.261072 | -3.80409  | -2.04007  |
| C                                                   | -0.332623 | -1.237456 | -0.501286 | H | -5.05331  | -1.365861 | -1.66527  |
| C                                                   | 0.674715  | -1.648749 | -1.595389 | H | -6.787204 | -1.643311 | -1.979593 |
| C                                                   | -0.228701 | -2.017044 | -2.775336 | H | -0.682299 | 3.159521  | 0.036267  |
| C                                                   | -1.413083 | -2.721759 | -2.112027 | H | -0.44603  | 2.621667  | -1.651132 |
| C                                                   | -0.752232 | 0.224974  | -0.700451 | H | 1.919054  | 0.2562    | 0.119932  |
| O                                                   | -1.762349 | 0.503781  | -1.370631 | H | 1.491524  | 4.117339  | -0.500415 |
| N                                                   | 0.047649  | 1.17412   | -0.196067 | H | 1.465043  | 2.888055  | 1.589194  |
| C                                                   | 1.234978  | 0.942048  | 0.631434  | H | 2.960092  | 2.306147  | 0.820114  |
| C                                                   | 1.872754  | 2.347913  | 0.728213  | H | 2.843988  | 1.956933  | -1.42265  |
| C                                                   | 1.407488  | 3.028288  | -0.55377  | H | 1.640005  | -0.488879 | 3.645292  |
| O                                                   | 2.114053  | 2.553008  | -1.696187 | H | 3.664383  | 0.52083   | 1.821431  |
| C                                                   | -0.044897 | 2.57499   | -0.636996 | H | 3.847741  | -0.661768 | 3.099092  |
| C                                                   | 0.88198   | 0.417834  | 2.022265  | H | 3.593457  | -2.731689 | -1.140322 |
| O                                                   | -0.256521 | 0.536397  | 2.486618  | H | 4.635404  | -3.673558 | -0.05351  |
| N                                                   | 1.892088  | -0.11897  | 2.733818  | H | 5.798984  | -0.432415 | 1.457144  |
| C                                                   | 3.226806  | -0.387354 | 2.24129   | H | 5.445694  | -1.649857 | -2.180331 |
| C                                                   | 3.274932  | -1.544273 | 1.240328  | H | 6.290162  | -3.138208 | -1.717711 |
| O                                                   | 2.34501   | -2.359908 | 1.162014  | H | 7.284847  | -0.795201 | -0.809457 |
| N                                                   | 4.384942  | -1.655561 | 0.497395  | H | 7.090176  | -2.114045 | 0.36569   |
| C                                                   | 5.477359  | -0.68681  | 0.445309  | H | 7.074097  | 2.575121  | 1.157484  |
| C                                                   | 6.559777  | -1.458215 | -0.331739 | H | 7.320748  | 0.826292  | 1.025877  |
| C                                                   | 5.739864  | -2.27736  | -1.33279  | H | 7.937338  | 1.897402  | -0.243558 |
| C                                                   | 4.503711  | -2.699321 | -0.535901 | H | 5.151762  | 2.59183   | -2.017019 |
| C                                                   | 5.049373  | 0.581536  | -0.311777 | H | 4.617427  | 3.347939  | -0.492985 |
| O                                                   | 3.981467  | 0.591096  | -0.957742 | H | 6.302799  | 3.527769  | -1.035662 |
| N                                                   | 5.854867  | 1.646936  | -0.269835 |   |           |           |           |

## (1b) PPII structure

|   |            |           |           |                                                                 |            |           |           |
|---|------------|-----------|-----------|-----------------------------------------------------------------|------------|-----------|-----------|
|   |            |           | H         | -7.833398                                                       | 3.376758   | -0.489579 |           |
|   |            |           | H         | -8.739197                                                       | 1.675283   | 0.944289  |           |
| C | -10.479837 | -0.880728 | 0.333836  | H                                                               | -9.926875  | 1.658129  | -0.388668 |
| C | -9.128877  | -0.992466 | -0.318832 | H                                                               | -7.877069  | 2.99142   | -2.805726 |
| O | -8.660899  | -2.084068 | -0.696512 | H                                                               | -5.184435  | -1.197029 | -2.080629 |
| N | -8.437963  | 0.146495  | -0.494577 | H                                                               | -4.422373  | -2.763482 | 0.277399  |
| C | -7.108136  | 0.13186   | -1.09519  | H                                                               | -3.50483   | -2.547539 | -1.216686 |
| C | -6.644093  | 1.594858  | -0.957588 | H                                                               | -1.845069  | 0.297144  | 2.173868  |
| C | -7.95013   | 2.387625  | -0.941707 | H                                                               | 0.43238    | -1.069867 | 2.884039  |
| O | -8.506073  | 2.50294   | -2.24984  | H                                                               | -1.137612  | -1.466135 | 3.617321  |
| C | -8.878363  | 1.498817  | -0.128074 | H                                                               | 0.170897   | -2.832805 | 1.204868  |
| C | -6.154189  | -0.78246  | -0.340914 | H                                                               | -0.428452  | -3.625459 | 2.67572   |
| O | -6.182542  | -0.883851 | 0.890785  | H                                                               | -1.998937  | -3.434437 | 0.419561  |
| N | -5.237865  | -1.418699 | -1.092509 | H                                                               | -2.72761   | -3.285808 | 2.037182  |
| C | -4.092563  | -2.024185 | -0.457354 | H                                                               | -10.418489 | -0.317131 | 1.269857  |
| C | -3.205506  | -0.977917 | 0.214297  | H                                                               | -10.864782 | -1.88146  | 0.531076  |
| O | -3.313085  | 0.231634  | -0.0421   | H                                                               | 0.781319   | 1.341862  | 2.968736  |
| N | -2.305928  | -1.441515 | 1.093044  | H                                                               | -0.757272  | 2.092489  | 2.453208  |
| C | -1.332481  | -0.532066 | 1.683361  | H                                                               | 1.052336   | 1.873194  | -0.911938 |
| C | -0.577932  | -1.432951 | 2.677533  | H                                                               | 1.434742   | 3.640869  | 2.675502  |
| C | -0.597885  | -2.798073 | 1.983687  | H                                                               | 2.938102   | 2.206475  | 1.45732   |
| C | -1.988965  | -2.860715 | 1.34925   | H                                                               | 2.528377   | 3.410078  | 0.212766  |
| C | -0.377229  | -0.007315 | 0.612112  | H                                                               | 0.608181   | 4.775454  | 0.793235  |
| O | -0.212139  | -0.606473 | -0.462196 | H                                                               | 2.833387   | 1.06978   | -2.027426 |
| N | 0.320244   | 1.100543  | 0.908915  | H                                                               | 3.844257   | -1.593284 | -1.371842 |
| C | 1.430607   | 1.509413  | 0.04879   | H                                                               | 4.425353   | -0.501326 | -2.632975 |
| C | 2.123497   | 2.626372  | 0.856919  | H                                                               | 6.043203   | -2.209705 | -2.393381 |
| C | 1.029143   | 3.140233  | 1.79142   | H                                                               | 5.73387    | -3.092919 | -0.878956 |
| O | 0.118462   | 3.998322  | 1.108569  | H                                                               | 7.311013   | -0.403623 | 1.084683  |
| C | 0.27102    | 1.874193  | 2.158204  | H                                                               | 8.403714   | -2.277034 | -2.100087 |
| C | 2.398255   | 0.354054  | -0.172126 | H                                                               | 8.001373   | -3.800834 | -1.285069 |
| O | 2.64851    | -0.461031 | 0.723938  | H                                                               | 9.384517   | -1.952801 | 0.1204    |
| N | 2.99963    | 0.313727  | -1.37193  | H                                                               | 7.974295   | -2.689937 | 0.907884  |
| C | 4.128735   | -0.558482 | -1.582026 | H                                                               | 9.943167   | 1.532173  | 1.867571  |
| C | 5.321831   | -0.163044 | -0.715658 | H                                                               | 9.17006    | -0.057299 | 1.788452  |
| O | 5.38317    | 0.93911   | -0.148086 | H                                                               | 10.800425  | 0.162168  | 1.124092  |
| N | 6.298413   | -1.074044 | -0.615613 | H                                                               | 10.788389  | 1.465539  | -1.442738 |
| C | 7.541101   | -0.747296 | 0.074799  | H                                                               | 9.416922   | 2.60062   | -1.411509 |
| C | 8.301511   | -2.085448 | 0.055979  | H                                                               | 10.603556  | 2.607138  | -0.088783 |
| C | 7.852831   | -2.719315 | -1.263824 |                                                                 |            |           |           |
| C | 6.373268   | -2.345098 | -1.360666 |                                                                 |            |           |           |
| C | 8.303936   | 0.340365  | -0.693278 |                                                                 |            |           |           |
| O | 8.035884   | 0.574578  | -1.884203 |                                                                 |            |           |           |
| N | 9.268312   | 1.013366  | -0.040048 |                                                                 |            |           |           |
| C | 10.064802  | 1.975191  | -0.796285 |                                                                 |            |           |           |
| C | 9.820478   | 0.633886  | 1.25722   |                                                                 |            |           |           |
| H | -11.173059 | -0.353312 | -0.330507 |                                                                 |            |           |           |
| H | -7.172035  | -0.177445 | -2.144394 |                                                                 |            |           |           |
| H | -6.131518  | 1.733879  | 0.000881  |                                                                 |            |           |           |
| H | -5.974004  | 1.895971  | -1.766145 |                                                                 |            |           |           |
|   |            |           |           | (2) Ac-Hyp-Gly- $\alpha$ -azPro(d)-Hyp-Gly-Pro-NMe <sub>2</sub> |            |           |           |
|   |            |           |           | (2a) PPI structure                                              |            |           |           |
|   |            |           | C         | -6.148663                                                       | -1.319112  | -1.159351 |           |
|   |            |           | C         | -6.455329                                                       | 0.126978   | -0.868508 |           |
|   |            |           | O         | -7.462517                                                       | 0.686794   | -1.340349 |           |
|   |            |           | N         | -5.58392                                                        | 0.806386   | -0.09784  |           |
|   |            |           | C         | -4.385758                                                       | 0.240233   | 0.517836  |           |
|   |            |           | C         | -3.713424                                                       | 1.465811   | 1.182714  |           |



|   |           |           |           |                     |           |           |           |
|---|-----------|-----------|-----------|---------------------|-----------|-----------|-----------|
| C | -4.211458 | 2.646653  | 0.354792  | H                   | -6.309148 | 2.525687  | 0.919111  |
| O | -3.486955 | 2.795248  | -0.863351 | H                   | -6.04599  | 2.730701  | -0.832701 |
| C | -5.660892 | 2.262612  | 0.07502   | H                   | -4.148753 | 3.589436  | 0.904047  |
| C | -4.704309 | -0.815791 | 1.575752  | H                   | -6.20224  | -1.927307 | -0.251065 |
| O | -5.810736 | -0.86761  | 2.125867  | H                   | -5.141295 | -1.422604 | -1.57606  |
| N | -3.699477 | -1.642849 | 1.920341  | H                   | -6.878425 | -1.69419  | -1.877472 |
| C | -2.387063 | -1.679923 | 1.309244  | H                   | -2.876243 | 2.040609  | -0.996435 |
| C | -2.411112 | -2.296596 | -0.086149 | H                   | 1.986793  | 0.29948   | 0.09157   |
| O | -3.307884 | -3.069643 | -0.447806 | H                   | -0.669514 | 3.150773  | -0.127078 |
| N | -1.412939 | -1.967584 | -0.917403 | H                   | -0.315773 | 2.659935  | -1.809475 |
| N | -0.370011 | -1.084248 | -0.568213 | H                   | 1.387577  | 2.897656  | 1.551685  |
| C | 0.744199  | -1.551987 | -1.445516 | H                   | 2.936165  | 2.354293  | 0.864164  |
| C | 0.038902  | -1.893664 | -2.758893 | H                   | 1.507236  | 4.170041  | -0.503128 |
| C | -1.284236 | -2.499617 | -2.285398 | H                   | 1.468053  | -0.489033 | 3.567654  |
| C | -0.745372 | 0.278153  | -0.809465 | H                   | 2.926339  | 2.012525  | -1.40124  |
| O | -1.800666 | 0.575944  | -1.382971 | H                   | 3.598207  | 0.489029  | 1.842736  |
| N | 0.122584  | 1.191746  | -0.355631 | H                   | 3.702644  | -0.684298 | 3.13918   |
| C | 1.250717  | 0.964263  | 0.549587  | H                   | 5.73208   | -0.501275 | 1.524757  |
| C | 1.855152  | 2.380753  | 0.707109  | H                   | 3.546516  | -2.768779 | -1.119772 |
| C | 1.455614  | 3.081288  | -0.587385 | H                   | 4.569556  | -3.706855 | -0.01155  |
| O | 2.250394  | 2.661784  | -1.6921   | H                   | 7.254409  | -0.863741 | -0.721845 |
| C | 0.022355  | 2.597686  | -0.773277 | H                   | 7.020689  | -2.186195 | 0.441725  |
| C | 0.809548  | 0.428047  | 1.907436  | H                   | 5.420811  | -1.683933 | -2.125803 |
| O | -0.347566 | 0.571533  | 2.313929  | H                   | 6.243163  | -3.18502  | -1.662984 |
| N | 1.773732  | -0.121988 | 2.671538  | H                   | 7.086588  | 2.470734  | 1.322368  |
| C | 3.128527  | -0.409587 | 2.249252  | H                   | 7.295679  | 0.719885  | 1.156013  |
| C | 3.204027  | -1.579407 | 1.266028  | H                   | 7.959447  | 1.803537  | -0.077913 |
| O | 2.286962  | -2.410549 | 1.198447  | H                   | 5.25359   | 2.59384   | -1.901989 |
| N | 4.314928  | -1.683121 | 0.522853  | H                   | 4.686393  | 3.338159  | -0.383962 |
| C | 5.427305  | -0.734424 | 0.502722  | H                   | 6.392845  | 3.48516   | -0.867167 |
| C | 6.511577  | -1.518631 | -0.260423 |                     |           |           |           |
| C | 5.697153  | -2.320898 | -1.279235 | (2b) PPII structure |           |           |           |
| C | 4.447176  | -2.734844 | -0.50119  |                     |           |           |           |
| C | 5.051323  | 0.55453   | -0.245643 | C                   | -10.43083 | -0.917076 | 0.711011  |
| O | 4.010729  | 0.597914  | -0.933112 | C                   | -9.113845 | -1.093041 | 0.004473  |
| N | 5.873536  | 1.603839  | -0.148363 | O                   | -8.602244 | -2.213799 | -0.180589 |
| C | 7.122569  | 1.643223  | 0.608331  | N                   | -8.504562 | 0.020893  | -0.436681 |
| C | 5.523608  | 2.826615  | -0.869345 | C                   | -7.203894 | -0.042998 | -1.095528 |
| H | -2.142182 | -2.194432 | -2.890244 | C                   | -6.808683 | 1.439462  | -1.242422 |
| H | -1.253157 | -3.591524 | -2.234072 | C                   | -8.151292 | 2.16731   | -1.290962 |
| H | 1.508245  | -0.781011 | -1.547626 | O                   | -8.77535  | 2.024858  | -2.565265 |
| H | 1.178481  | -2.435496 | -0.976255 | C                   | -8.992242 | 1.398243  | -0.283913 |
| H | -0.138644 | -0.981785 | -3.336911 | C                   | -6.172711 | -0.771727 | -0.246786 |
| H | 0.618998  | -2.590269 | -3.366432 | O                   | -6.144604 | -0.664492 | 0.984442  |
| H | -1.941315 | -0.685181 | 1.299618  | N                   | -5.257944 | -1.48054  | -0.930748 |
| H | -1.738261 | -2.299164 | 1.936018  | C                   | -4.084551 | -1.988471 | -0.265859 |
| H | -3.926684 | -2.348358 | 2.614503  | C                   | -3.19385  | -0.859273 | 0.245978  |
| H | -3.736071 | -0.17425  | -0.260115 | O                   | -3.351364 | 0.319227  | -0.094    |
| H | -4.069777 | 1.574033  | 2.212819  | N                   | -2.216559 | -1.257459 | 1.074947  |
| H | -2.622954 | 1.388395  | 1.19566   | N                   | -1.29966  | -0.310906 | 1.564518  |



|   |           |           |           |   |            |           |           |
|---|-----------|-----------|-----------|---|------------|-----------|-----------|
| O | 2.10653   | 2.61821   | -1.648951 | H | 7.268221   | -0.783759 | -0.852213 |
| C | -0.068114 | 2.599257  | -0.612772 | H | 7.07228    | -2.128231 | 0.293065  |
| C | 0.880389  | 0.420921  | 2.03942   | H | 5.430678   | -1.608852 | -2.244293 |
| O | -0.247981 | 0.551261  | 2.525741  | H | 6.276344   | -3.106197 | -1.813796 |
| N | 1.88649   | -0.169471 | 2.711558  | H | 7.074966   | 2.526632  | 1.220845  |
| C | 3.211665  | -0.43358  | 2.192527  | H | 7.311023   | 0.780868  | 1.037194  |
| C | 3.24321   | -1.558077 | 1.153753  | H | 7.937815   | 1.885364  | -0.197949 |
| O | 2.298986  | -2.353789 | 1.038327  | H | 5.166999   | 2.647035  | -1.95987  |
| N | 4.360043  | -1.665915 | 0.421717  | H | 4.628729   | 3.364726  | -0.418856 |
| C | 5.459439  | -0.702526 | 0.402502  | H | 6.318627   | 3.548307  | -0.946674 |
| C | 6.542512  | -1.457087 | -0.390157 |   |            |           |           |
| C | 5.724994  | -2.254455 | -1.410494 |   |            |           |           |
| C | 4.488368  | -2.694461 | -0.625394 |   |            |           |           |
| C | 5.041595  | 0.592009  | -0.315027 | C | -10.427223 | -0.566389 | 0.190544  |
| O | 3.974277  | 0.631162  | -0.960395 | C | -9.073901  | -0.689683 | -0.455177 |
| N | 5.853636  | 1.650279  | -0.236138 | O | -8.626629  | -1.779398 | -0.861774 |
| C | 7.114366  | 1.705545  | 0.499459  | N | -8.3576    | 0.439433  | -0.590088 |
| C | 5.461664  | 2.873978  | -0.932749 | C | -7.01943   | 0.417234  | -1.170674 |
| H | 0.099847  | -1.357646 | 0.578882  | C | -6.520122  | 1.858172  | -0.95749  |
| H | -2.156403 | -2.604431 | -2.603844 | C | -7.806037  | 2.683761  | -0.944889 |
| H | -1.073137 | -3.841748 | -1.916812 | O | -8.322225  | 2.861586  | -2.26241  |
| H | 1.300788  | -2.26522  | -1.024605 | C | -8.779066  | 1.789638  | -0.191596 |
| H | -0.353195 | -1.174254 | -3.189662 | C | -6.111132  | -0.568435 | -0.450134 |
| H | 0.608511  | -2.662891 | -3.188824 | O | -6.175527  | -0.748006 | 0.771673  |
| H | -2.021331 | -0.663491 | 1.372743  | N | -5.200005  | -1.181545 | -1.221819 |
| H | -1.877701 | -2.23339  | 2.128108  | C | -4.152414  | -1.975539 | -0.632034 |
| H | -4.098554 | -2.220703 | 2.690066  | C | -3.214139  | -1.139882 | 0.23076   |
| H | -3.718349 | -0.181136 | -0.259505 | O | -3.217019  | 0.100029  | 0.209805  |
| H | -4.123304 | 1.668154  | 2.127618  | N | -2.378704  | -1.83165  | 1.018436  |
| H | -2.639325 | 1.425124  | 1.179669  | C | -1.331932  | -1.136611 | 1.771575  |
| H | -6.291288 | 2.595153  | 0.719867  | N | -0.621818  | -2.183816 | 2.492964  |
| H | -5.959838 | 2.762324  | -1.024879 | C | -0.734305  | -3.36996  | 1.622832  |
| H | -4.115403 | 3.639849  | 0.754235  | C | -2.118035  | -3.277807 | 0.967551  |
| H | -6.122618 | -1.869985 | -0.381739 | C | -0.364561  | -0.445994 | 0.801433  |
| H | -5.029698 | -1.394533 | -1.692013 | O | -0.168627  | -0.907807 | -0.333524 |
| H | -6.757478 | -1.681627 | -2.031811 | N | 0.300764   | 0.626555  | 1.249308  |
| H | -2.832357 | 1.990921  | -1.072933 | C | 1.349661   | 1.221108  | 0.422565  |
| H | 1.903564  | 0.301135  | 0.126234  | C | 1.976562   | 2.277761  | 1.348671  |
| H | -0.721015 | 3.180125  | 0.048524  | C | 0.826185   | 2.662333  | 2.275915  |
| H | -0.45453  | 2.637869  | -1.633074 | O | -0.113512  | 3.507327  | 1.616448  |
| H | 1.420929  | 2.912756  | 1.633005  | C | 0.134211   | 1.332071  | 2.532405  |
| H | 2.929144  | 2.353773  | 0.871534  | C | 2.390629   | 0.19012   | 0.012701  |
| H | 1.446386  | 4.158626  | -0.446263 | O | 2.72923    | -0.732961 | 0.762525  |
| H | 1.645886  | -0.554992 | 3.619703  | N | 2.955324   | 0.388973  | -1.189503 |
| H | 2.828097  | 2.011098  | -1.377635 | C | 4.118967   | -0.364933 | -1.583567 |
| H | 3.650817  | 0.484447  | 1.796011  | C | 5.328616   | -0.05171  | -0.706323 |
| H | 3.841309  | -0.739248 | 3.033306  | O | 5.339175   | 0.90668   | 0.081968  |
| H | 5.77749   | -0.480423 | 1.423113  | N | 6.376723   | -0.872612 | -0.849233 |
| H | 3.582322  | -2.726061 | -1.235753 | C | 7.624443   | -0.609722 | -0.140959 |
| H | 4.62411   | -3.673577 | -0.153919 | C | 8.475241   | -1.847566 | -0.480648 |

## (3b) PPII structure

|   |            |           |           |                                                                 |           |           |           |
|---|------------|-----------|-----------|-----------------------------------------------------------------|-----------|-----------|-----------|
| C | 8.004877   | -2.210994 | -1.89182  | (4) Ac-Hyp-Gly- $\gamma$ -azPro(d)-Hyp-Gly-Pro-NMe <sub>2</sub> |           |           |           |
| C | 6.498644   | -1.954941 | -1.844053 |                                                                 |           |           |           |
| C | 8.274348   | 0.676997  | -0.667473 | (4a) PPI structure                                              |           |           |           |
| O | 7.926671   | 1.153796  | -1.761152 |                                                                 |           |           |           |
| N | 9.2314     | 1.254077  | 0.08223   | C                                                               | -6.056632 | -1.237791 | -1.29679  |
| C | 9.933501   | 2.40429   | -0.479045 | C                                                               | -6.352192 | 0.217224  | -1.040832 |
| C | 9.883088   | 0.628858  | 1.229923  | O                                                               | -7.307471 | 0.796012  | -1.590456 |
| H | -1.77204   | -0.420834 | 2.464786  | N                                                               | -5.524847 | 0.882119  | -0.211006 |
| H | -2.110072  | -3.641741 | -0.062564 | C                                                               | -4.380603 | 0.293615  | 0.482959  |
| H | -2.878215  | -3.819706 | 1.53879   | C                                                               | -3.69039  | 1.516918  | 1.138137  |
| H | -1.156717  | -2.369083 | 3.341894  | C                                                               | -4.127096 | 2.692225  | 0.267383  |
| H | 0.04922    | -3.33388  | 0.862834  | O                                                               | -3.359263 | 2.797178  | -0.928087 |
| H | -0.610314  | -4.279075 | 2.210892  | C                                                               | -5.576087 | 2.339833  | -0.053643 |
| H | -4.582379  | -2.782245 | -0.029589 | C                                                               | -4.794602 | -0.709293 | 1.56028   |
| H | -3.570824  | -2.43433  | -1.436383 | O                                                               | -5.932346 | -0.710582 | 2.043755  |
| H | -5.144738  | -0.9427   | -2.205285 | N                                                               | -3.83508  | -1.544062 | 2.003595  |
| H | -7.074765  | 0.162514  | -2.235113 | C                                                               | -2.508767 | -1.676886 | 1.44061   |
| H | -6.02964   | 1.943617  | 0.018841  | C                                                               | -2.512996 | -2.365066 | 0.077106  |
| H | -5.820821  | 2.174938  | -1.734694 | O                                                               | -3.43883  | -3.113415 | -0.267076 |
| H | -8.671628  | 1.927419  | 0.889984  | N                                                               | -1.455006 | -2.143505 | -0.713429 |
| H | -9.815132  | 1.981444  | -0.479188 | C                                                               | -0.3361   | -1.248621 | -0.463781 |
| H | -7.67759   | 3.652291  | -0.453043 | C                                                               | 0.618339  | -1.681285 | -1.607039 |
| H | -11.098041 | 0.01332   | -0.452605 | N                                                               | -0.272077 | -2.027206 | -2.717317 |
| H | -10.354724 | -0.048537 | 1.152098  | C                                                               | -1.379255 | -2.715403 | -2.077532 |
| H | -10.844796 | -1.562328 | 0.339432  | C                                                               | -0.743913 | 0.215126  | -0.663785 |
| H | -7.666796  | 3.354786  | -2.782288 | O                                                               | -1.743117 | 0.492239  | -1.352021 |
| H | 0.908865   | 1.678356  | -0.470193 | N                                                               | 0.052203  | 1.16211   | -0.152723 |
| H | 0.631563   | 0.791275  | 3.343456  | C                                                               | 1.246144  | 0.924171  | 0.663631  |
| H | -0.920836  | 1.473618  | 2.773713  | C                                                               | 1.872258  | 2.333134  | 0.786316  |
| H | 2.781017   | 1.827929  | 1.941365  | C                                                               | 1.394914  | 3.036511  | -0.478957 |
| H | 2.376452   | 3.129207  | 0.793153  | O                                                               | 2.104564  | 2.597285  | -1.633798 |
| H | 1.170211   | 3.124639  | 3.205674  | C                                                               | -0.052525 | 2.56929   | -0.569888 |
| H | 2.695311   | 1.209197  | -1.725658 | C                                                               | 0.905795  | 0.366684  | 2.04436   |
| H | 0.336023   | 4.332185  | 1.370095  | O                                                               | -0.230795 | 0.466375  | 2.517679  |
| H | 3.902244   | -1.436829 | -1.543848 | N                                                               | 1.924493  | -0.179281 | 2.735986  |
| H | 4.360966   | -0.112463 | -2.619387 | C                                                               | 3.253673  | -0.433211 | 2.221412  |
| H | 7.419657   | -0.517318 | 0.927409  | C                                                               | 3.291657  | -1.563908 | 1.190195  |
| H | 6.095917   | -1.642189 | -2.810317 | O                                                               | 2.357902  | -2.373099 | 1.093749  |
| H | 5.94927    | -2.837614 | -1.498388 | N                                                               | 4.398399  | -1.660467 | 0.440874  |
| H | 9.548319   | -1.648736 | -0.424606 | C                                                               | 5.488471  | -0.688847 | 0.402541  |
| H | 8.233232   | -2.648116 | 0.22564   | C                                                               | 6.569498  | -1.443758 | -0.392393 |
| H | 8.471946   | -1.546572 | -2.625959 | C                                                               | 5.747725  | -2.248853 | -1.403499 |
| H | 8.234539   | -3.243476 | -2.16259  | C                                                               | 4.515712  | -2.686961 | -0.609142 |
| H | 10.63913   | 2.092927  | -1.257711 | C                                                               | 5.05287   | 0.592796  | -0.327465 |
| H | 9.220193   | 3.110049  | -0.906014 | O                                                               | 3.978478  | 0.613918  | -0.962684 |
| H | 10.483758  | 2.895873  | 0.324558  | N                                                               | 5.858293  | 1.657504  | -0.273081 |
| H | 10.025185  | 1.380494  | 2.01017   | C                                                               | 7.122542  | 1.733632  | 0.454682  |
| H | 9.288365   | -0.183274 | 1.642122  | C                                                               | 5.448517  | 2.871611  | -0.976097 |
| H | 10.863719  | 0.236033  | 0.938025  | H                                                               | -6.125652 | -1.827416 | -0.377454 |
|   |            |           |           | H                                                               | -3.712556 | -0.177272 | -0.246093 |

|                     |            |           |           |   |            |           |           |
|---------------------|------------|-----------|-----------|---|------------|-----------|-----------|
| H                   | -4.074919  | 1.662324  | 2.153325  | O | -8.575615  | 2.442202  | -2.312932 |
| H                   | -2.602842  | 1.40764   | 1.190071  | C | -8.840582  | 1.577742  | -0.11938  |
| H                   | -4.056006  | 3.645106  | 0.797654  | C | -6.148145  | -0.737265 | -0.333592 |
| H                   | -6.243648  | 2.62313   | 0.768836  | O | -6.151151  | -0.813642 | 0.900339  |
| H                   | -5.922635  | 2.808004  | -0.976415 | N | -5.244129  | -1.384383 | -1.089753 |
| H                   | -2.797396  | 2.002992  | -1.048956 | C | -4.104348  | -2.010317 | -0.466788 |
| H                   | -4.12759   | -2.218762 | 2.703682  | C | -3.197541  | -0.986465 | 0.212388  |
| H                   | -2.014191  | -0.703515 | 1.39664   | O | -3.266863  | 0.224903  | -0.041918 |
| H                   | -1.912968  | -2.291534 | 2.122483  | N | -2.319811  | -1.479082 | 1.098139  |
| H                   | 0.107721   | -1.434022 | 0.51663   | C | -1.307245  | -0.62792  | 1.697001  |
| H                   | 1.335306   | -0.907944 | -1.889699 | C | -0.568518  | -1.636607 | 2.605484  |
| H                   | 1.160332   | -2.573248 | -1.282916 | N | -0.680476  | -2.922945 | 1.907992  |
| H                   | -0.632975  | -1.15742  | -3.110926 | C | -2.024382  | -2.910627 | 1.358447  |
| H                   | -2.315818  | -2.55346  | -2.613706 | C | -0.355877  | -0.089045 | 0.632444  |
| H                   | -1.183628  | -3.788995 | -2.002886 | O | -0.193347  | -0.684249 | -0.44489  |
| H                   | -5.043582  | -1.354862 | -1.697166 | N | 0.347896   | 1.009313  | 0.943435  |
| H                   | -6.77774   | -1.621519 | -2.018963 | C | 1.441089   | 1.446412  | 0.075431  |
| H                   | -0.696864  | 3.133572  | 0.114131  | C | 2.141261   | 2.541086  | 0.905421  |
| H                   | -0.45308   | 2.631169  | -1.583384 | C | 1.041681   | 3.05382   | 1.833481  |
| H                   | 1.932171   | 0.256828  | 0.130608  | O | 0.138329   | 3.915925  | 1.145906  |
| H                   | 1.466284   | 4.124913  | -0.401392 | C | 0.275724   | 1.788907  | 2.18939   |
| H                   | 1.465278   | 2.851359  | 1.66097   | C | 2.413054   | 0.308892  | -0.209558 |
| H                   | 2.960638   | 2.299723  | 0.87036   | O | 2.679582   | -0.551276 | 0.637671  |
| H                   | 2.833273   | 1.991848  | -1.378368 | N | 3.006271   | 0.343603  | -1.414291 |
| H                   | 1.680767   | -0.57744  | 3.637838  | C | 4.155857   | -0.486591 | -1.680254 |
| H                   | 3.685066   | 0.486307  | 1.820198  | C | 5.324059   | -0.14642  | -0.757868 |
| H                   | 3.884872   | -0.728308 | 3.064704  | O | 5.356992   | 0.911274  | -0.110414 |
| H                   | 3.603137   | -2.712541 | -1.210791 | N | 6.305999   | -1.057011 | -0.687887 |
| H                   | 4.651878   | -3.667689 | -0.141302 | C | 7.522727   | -0.752467 | 0.056843  |
| H                   | 5.813171   | -0.452403 | 1.417827  | C | 8.312378   | -2.068551 | -0.03685  |
| H                   | 5.448338   | -1.60876  | -2.23971  | C | 7.94176    | -2.592237 | -1.427559 |
| H                   | 6.298721   | -3.101746 | -1.804797 | C | 6.461895   | -2.227148 | -1.577064 |
| H                   | 7.290448   | -0.770964 | -0.862566 | C | 8.28116    | 0.399656  | -0.61679  |
| H                   | 7.104995   | -2.109566 | 0.291578  | O | 8.043172   | 0.698673  | -1.799869 |
| H                   | 7.079376   | 2.562767  | 1.166637  | N | 9.21205    | 1.05171   | 0.102246  |
| H                   | 7.331209   | 0.817219  | 1.001979  | C | 10.021987  | 2.055288  | -0.581162 |
| H                   | 7.940088   | 1.913334  | -0.249608 | C | 9.727858   | 0.612361  | 1.39563   |
| H                   | 5.137055   | 2.632374  | -1.995393 | H | -11.182175 | -0.28751  | -0.232482 |
| H                   | 4.622575   | 3.36424   | -0.452628 | H | -7.236022  | -0.215995 | -2.118895 |
| H                   | 6.30203    | 3.549454  | -1.012413 | H | -6.089933  | 1.81013   | -0.139789 |
|                     |            |           |           | H | -6.019177  | 1.864447  | -1.918277 |
| (4b) PPII structure |            |           |           | H | -7.815677  | 3.427847  | -0.648231 |
|                     |            |           |           | H | -8.641572  | 1.809353  | 0.932707  |
| C                   | -10.472858 | -0.768843 | 0.449863  | H | -9.900508  | 1.731308  | -0.332024 |
| C                   | -9.136744  | -0.91648  | -0.226362 | H | -7.980753  | 2.897267  | -2.930731 |
| O                   | -8.696551  | -2.023765 | -0.591987 | H | -5.219111  | -1.199562 | -2.086394 |
| N                   | -8.42712   | 0.204609  | -0.437279 | H | -4.44101   | -2.754163 | 0.260928  |
| C                   | -7.124385  | 0.14973   | -1.091967 | H | -3.526746  | -2.53118  | -1.235655 |
| C                   | -6.649404  | 1.615217  | -1.061527 | H | -1.76915   | 0.182059  | 2.263087  |
| C                   | -7.952971  | 2.41218   | -1.030509 | H | 0.476569   | -1.374614 | 2.777766  |

|                                                                 |            |           |           |   |           |           |           |
|-----------------------------------------------------------------|------------|-----------|-----------|---|-----------|-----------|-----------|
| H                                                               | -1.086514  | -1.695388 | 3.566179  | C | -0.332507 | -1.218128 | -0.505568 |
| H                                                               | -0.028151  | -2.902749 | 1.122559  | C | 0.645162  | -1.638688 | -1.620987 |
| H                                                               | -2.072895  | -3.502325 | 0.443866  | C | -0.30906  | -2.034833 | -2.738635 |
| H                                                               | -2.740072  | -3.297513 | 2.088994  | N | -1.382012 | -2.756331 | -2.024529 |
| H                                                               | -10.396366 | -0.149799 | 1.348411  | C | -0.751302 | 0.24443   | -0.700127 |
| H                                                               | -10.848191 | -1.757446 | 0.715647  | O | -1.756987 | 0.521055  | -1.376411 |
| H                                                               | 0.765692   | 1.256128  | 3.011739  | N | 0.047704  | 1.187479  | -0.186972 |
| H                                                               | -0.757704  | 2.012701  | 2.460722  | C | 1.236325  | 0.944342  | 0.636421  |
| H                                                               | 1.042005   | 1.842176  | -0.864234 | C | 1.876687  | 2.347783  | 0.746879  |
| H                                                               | 1.441171   | 3.550294  | 2.722615  | C | 1.412147  | 3.04095   | -0.52856  |
| H                                                               | 2.941838   | 2.100361  | 1.509813  | O | 2.116007  | 2.572691  | -1.675461 |
| H                                                               | 2.564551   | 3.327809  | 0.276865  | C | -0.041724 | 2.59272   | -0.614857 |
| H                                                               | 0.632563   | 4.692002  | 0.834745  | C | 0.882963  | 0.405055  | 2.021515  |
| H                                                               | 2.822638   | 1.133941  | -2.022352 | O | -0.25641  | 0.516843  | 2.485109  |
| H                                                               | 3.890466   | -1.542003 | -1.571083 | N | 1.893022  | -0.138079 | 2.727951  |
| H                                                               | 4.467561   | -0.326446 | -2.716201 | C | 3.225441  | -0.405958 | 2.229316  |
| H                                                               | 6.201261   | -1.96938  | -2.606583 | C | 3.267527  | -1.554684 | 1.218546  |
| H                                                               | 5.809368   | -3.039504 | -1.24072  | O | 2.332758  | -2.363904 | 1.131987  |
| H                                                               | 7.259128   | -0.487505 | 1.081627  | N | 4.378239  | -1.666195 | 0.476899  |
| H                                                               | 8.531992   | -2.077595 | -2.192051 | C | 5.473261  | -0.699986 | 0.432197  |
| H                                                               | 8.106275   | -3.666635 | -1.531791 | C | 6.553877  | -1.467906 | -0.350848 |
| H                                                               | 9.387878   | -1.923636 | 0.094069  | C | 5.73222   | -2.280004 | -1.356242 |
| H                                                               | 7.955834   | -2.749604 | 0.742402  | C | 4.496202  | -2.70523  | -0.561072 |
| H                                                               | 9.816248   | 1.478233  | 2.056417  | C | 5.048584  | 0.576248  | -0.313407 |
| H                                                               | 9.071095   | -0.115013 | 1.86707   | O | 3.979757  | 0.595797  | -0.957892 |
| H                                                               | 10.718551  | 0.161408  | 1.270606  | N | 5.857873  | 1.638293  | -0.262356 |
| H                                                               | 10.750955  | 1.581674  | -1.248621 | C | 7.119354  | 1.714368  | 0.470364  |
| H                                                               | 9.385806   | 2.721284  | -1.16541  | C | 5.457482  | 2.848048  | -0.978735 |
| H                                                               | 10.554197  | 2.638241  | 0.171694  | H | -6.101195 | -1.846402 | -0.371622 |
|                                                                 |            |           |           | H | -3.699751 | -0.175253 | -0.23988  |
| (5) Ac-Hyp-Gly- $\delta$ -azPro(d)-Hyp-Gly-Pro-NMe <sub>2</sub> |            |           |           | H | -4.062379 | 1.639493  | 2.17855   |
|                                                                 |            |           |           | H | -2.59452  | 1.404743  | 1.203623  |
| (5a) PPI structure                                              |            |           |           | H | -4.068513 | 3.633093  | 0.839495  |
|                                                                 |            |           |           | H | -6.248413 | 2.598614  | 0.810013  |
| C                                                               | -6.040478  | -1.247431 | -1.285521 | H | -5.934669 | 2.793637  | -0.935203 |
| C                                                               | -6.346747  | 0.202579  | -1.014418 | H | -2.812721 | 2.014779  | -1.033805 |
| O                                                               | -7.308462  | 0.778838  | -1.555419 | H | -4.079413 | -2.255135 | 2.686986  |
| N                                                               | -5.522095  | 0.866536  | -0.180927 | H | -1.97991  | -0.716518 | 1.386121  |
| C                                                               | -4.366916  | 0.281986  | 0.498679  | H | -1.870652 | -2.312445 | 2.096829  |
| C                                                               | -3.68312   | 1.505407  | 1.159793  | H | 0.090189  | -1.401683 | 0.484509  |
| C                                                               | -4.134222  | 2.684364  | 0.301183  | H | 1.333776  | -0.838922 | -1.904713 |
| O                                                               | -3.372969  | 2.807409  | -0.896542 | H | 1.220588  | -2.5014   | -1.276323 |
| C                                                               | -5.581865  | 2.323287  | -0.015893 | H | -0.694141 | -1.148788 | -3.25442  |
| C                                                               | -4.763004  | -0.73642  | 1.568235  | H | 0.151166  | -2.703401 | -3.466635 |
| O                                                               | -5.897211  | -0.755507 | 2.059552  | H | -2.282484 | -2.583115 | -2.476768 |
| N                                                               | -3.792856  | -1.566341 | 1.998188  | H | -5.027978 | -1.353089 | -1.690716 |
| C                                                               | -2.470488  | -1.692106 | 1.423965  | H | -6.761427 | -1.629898 | -2.008545 |
| C                                                               | -2.493118  | -2.36755  | 0.05381   | H | -0.67708  | 3.171448  | 0.065165  |
| O                                                               | -3.422377  | -3.114443 | -0.292911 | H | -0.443631 | 2.650107  | -1.628129 |
| N                                                               | -1.454602  | -2.114947 | -0.745192 | H | 1.917914  | 0.26369   | 0.114071  |

|   |          |           |           |   |            |           |           |
|---|----------|-----------|-----------|---|------------|-----------|-----------|
| H | 1.499294 | 4.129222  | -0.465949 | C | 0.359804   | 1.188555  | 2.904397  |
| H | 1.470884 | 2.880084  | 1.613587  | C | 2.257216   | 0.314994  | 0.072941  |
| H | 2.964033 | 2.30289   | 0.837189  | O | 2.610184   | -0.684615 | 0.709068  |
| H | 2.846089 | 1.974271  | -1.407533 | N | 2.734444   | 0.597329  | -1.150445 |
| H | 1.639318 | -0.523527 | 3.632577  | C | 3.84441    | -0.154857 | -1.682592 |
| H | 3.663638 | 0.504758  | 1.815829  | C | 5.109938   | 0.032821  | -0.849086 |
| H | 3.848372 | -0.688806 | 3.082929  | O | 5.213738   | 0.937793  | -0.006453 |
| H | 3.58592  | -2.734846 | -1.165497 | N | 6.098735   | -0.839456 | -1.083119 |
| H | 4.627812 | -3.681426 | -0.082612 | C | 7.381988   | -0.692146 | -0.406964 |
| H | 5.795527 | -0.454878 | 1.446135  | C | 8.148687   | -1.94908  | -0.856354 |
| H | 5.438104 | -1.647216 | -2.199883 | C | 7.612835   | -2.19416  | -2.269961 |
| H | 6.281171 | -3.139182 | -1.746797 | C | 6.126754   | -1.849458 | -2.156962 |
| H | 7.279197 | -0.802766 | -0.825198 | C | 8.08235    | 0.592539  | -0.869854 |
| H | 7.084271 | -2.128761 | 0.341826  | O | 7.74293    | 1.146511  | -1.929187 |
| H | 7.077147 | 2.548817  | 1.176103  | N | 9.064525   | 1.090099  | -0.095349 |
| H | 7.321842 | 0.801159  | 1.025223  | C | 9.794648   | 2.255093  | -0.58602  |
| H | 7.940598 | 1.885372  | -0.231796 | C | 9.715122   | 0.365456  | 0.993111  |
| H | 5.157308 | 2.602044  | -1.999855 | H | -10.921123 | 0.217155  | -1.232106 |
| H | 4.626594 | 3.34577   | -0.468281 | H | -6.666092  | 0.11424   | -2.306034 |
| H | 6.312288 | 3.524491  | -1.01032  | H | -5.859492  | 1.836626  | 0.088517  |

## (5b) PPII structure

|   |            |           |           |   |            |           |           |
|---|------------|-----------|-----------|---|------------|-----------|-----------|
| C | -10.398592 | -0.36512  | -0.465202 | H | -7.283824  | 3.653629  | -0.648953 |
| C | -8.967332  | -0.580813 | -0.876221 | H | -8.595197  | 2.022238  | 0.536381  |
| O | -8.536571  | -1.698683 | -1.218791 | H | -9.50168   | 2.133399  | -0.997969 |
| N | -8.158109  | 0.491888  | -0.869628 | H | -6.933453  | 3.304105  | -2.947649 |
| C | -6.753317  | 0.370793  | -1.243788 | H | -4.819681  | -1.069394 | -1.9936   |
| C | -6.192487  | 1.775017  | -0.953658 | H | -4.596283  | -2.832591 | 0.342938  |
| C | -7.402611  | 2.686913  | -1.146693 | H | -3.457656  | -2.669006 | -0.993386 |
| O | -7.697038  | 2.87315   | -2.529851 | H | -1.658899  | -0.4484   | 2.818686  |
| C | -8.540826  | 1.874225  | -0.547509 | H | 0.652473   | -2.016223 | 2.680992  |
| C | -6.025231  | -0.669731 | -0.405629 | H | -0.764748  | -2.486018 | 3.651857  |
| O | -6.276683  | -0.843924 | 0.791867  | H | -0.158917  | -3.329522 | 0.762342  |
| N | -5.050034  | -1.340974 | -1.043952 | H | -0.581359  | -4.395631 | 2.124467  |
| C | -4.085383  | -2.109235 | -0.296624 | H | -2.699072  | -3.586637 | 2.17329   |
| C | -3.193759  | -1.206269 | 0.550191  | H | -10.459802 | 0.187791  | 0.476891  |
| O | -3.256983  | 0.029095  | 0.500849  | H | -10.886997 | -1.333801 | -0.356722 |
| N | -2.33393   | -1.826238 | 1.374113  | H | 0.945253   | 0.50278   | 3.527302  |
| C | -1.253142  | -1.108322 | 2.050677  | H | -0.637219  | 1.312111  | 3.330278  |
| C | -0.412784  | -2.258068 | 2.642003  | H | 0.816003   | 1.912055  | -0.134975 |
| C | -0.737228  | -3.408989 | 1.686628  | H | 1.554746   | 2.830245  | 3.691695  |
| N | -2.166153  | -3.241268 | 1.370948  | H | 2.937466   | 1.73279   | 2.047052  |
| C | -0.414809  | -0.325567 | 1.040235  | H | 2.413698   | 3.180545  | 1.154024  |
| O | -0.340828  | -0.672718 | -0.147836 | H | 0.537871   | 4.327921  | 2.202255  |
| N | 0.296735   | 0.70837   | 1.514929  | H | 2.493262   | 1.484324  | -1.578663 |
| C | 1.303275   | 1.344699  | 0.66465   | H | 3.587148   | -1.216859 | -1.730519 |
| C | 2.070812   | 2.262674  | 1.636692  | H | 4.040255   | 0.186122  | -2.702942 |
| C | 1.070048   | 2.525091  | 2.75968   | H | 5.721345   | -1.439704 | -3.085122 |
| O | 0.089064   | 3.483512  | 2.371523  | H | 5.530698   | -2.719879 | -1.861928 |
|   |            |           |           | H | 7.216239   | -0.660786 | 0.671258  |
|   |            |           |           | H | 8.098462   | -1.516932 | -2.97965  |

|   |           |           |           |   |          |           |           |
|---|-----------|-----------|-----------|---|----------|-----------|-----------|
| H | 7.768518  | -3.220428 | -2.60862  | C | 6.397638 | -1.522624 | -0.36081  |
| H | 9.232673  | -1.813986 | -0.824863 | C | 5.54761  | -2.323817 | -1.350368 |
| H | 7.883185  | -2.779365 | -0.194221 | C | 4.324774 | -2.729662 | -0.527575 |
| H | 9.875796  | 1.049811  | 1.829695  | C | 4.961762 | 0.572037  | -0.308912 |
| H | 9.112871  | -0.470338 | 1.342568  | O | 3.893433 | 0.63667   | -0.950725 |
| H | 10.68626  | -0.01815  | 0.660305  | N | 5.809903 | 1.603524  | -0.254469 |
| H | 10.500097 | 1.973975  | -1.376376 | C | 7.069346 | 1.63602   | 0.485043  |
| H | 9.097998  | 2.996748  | -0.977774 | C | 5.446209 | 2.834021  | -0.954788 |
| H | 10.348174 | 2.690015  | 0.247657  | H | 0.168744 | -1.253266 | 0.420425  |

(6) Ac-Hyp-Gly- $\delta$ -azPro(u)-Hyp-Gly-Pro-NMe<sub>2</sub>

## (6a) PPI structure

|   |           |           |           |   |           |           |           |
|---|-----------|-----------|-----------|---|-----------|-----------|-----------|
| C | -5.94757  | -1.418709 | -1.227787 | H | 0.601185  | -0.781815 | -2.538204 |
| C | -6.322381 | 0.027538  | -1.03017  | H | 1.774778  | -1.334739 | -1.319247 |
| O | -7.321693 | 0.524301  | -1.581754 | H | 0.645119  | -3.158994 | -3.043747 |
| N | -5.520775 | 0.776505  | -0.247796 | H | 0.760751  | -3.583735 | -1.315036 |
| C | -4.335292 | 0.28276   | 0.449733  | H | -1.939266 | -0.562935 | 1.252919  |
| C | -3.725202 | 1.564753  | 1.068936  | H | -1.673846 | -2.079846 | 2.078727  |
| C | -4.227007 | 2.682866  | 0.158534  | H | -3.896732 | -2.190409 | 2.684153  |
| O | -3.456949 | 2.799725  | -1.033781 | H | -3.64207  | -0.158184 | -0.274639 |
| C | -5.651804 | 2.235407  | -0.155263 | H | -4.124577 | 1.71847   | 2.077115  |
| C | -4.669895 | -0.722895 | 1.551745  | H | -2.633421 | 1.524229  | 1.12795   |
| O | -5.793003 | -0.779225 | 2.064793  | H | -6.341124 | 2.516705  | 0.649566  |
| N | -3.656596 | -1.50059  | 1.978479  | H | -6.017286 | 2.64245   | -1.099567 |
| C | -2.342556 | -1.568657 | 1.378158  | H | -4.216573 | 3.654532  | 0.658442  |
| C | -2.335996 | -2.36857  | 0.074371  | H | -6.031772 | -1.980588 | -0.292059 |
| O | -3.18626  | -3.237091 | -0.141476 | H | -4.91482  | -1.504835 | -1.582555 |
| N | -1.346526 | -2.067847 | -0.787496 | H | -6.622341 | -1.856642 | -1.963915 |
| C | -0.273363 | -1.089396 | -0.565646 | H | -2.868531 | 2.023452  | -1.147091 |
| C | 0.747085  | -1.438421 | -1.67363  | H | 1.877999  | 0.411657  | 0.131746  |
| C | 0.351724  | -2.868325 | -2.034514 | H | -0.737716 | 3.293594  | -0.012371 |
| N | -1.115506 | -2.883554 | -1.926915 | H | -0.462988 | 2.752785  | -1.693482 |
| C | -0.75002  | 0.34688   | -0.762906 | H | 1.372667  | 3.037434  | 1.58867   |
| O | -1.739918 | 0.589743  | -1.474112 | H | 2.889492  | 2.457048  | 0.860783  |
| N | 0.006491  | 1.311771  | -0.224805 | H | 1.444165  | 4.259616  | -0.506497 |
| C | 1.177816  | 1.088833  | 0.630645  | H | 1.513884  | -0.397887 | 3.62506   |
| C | 1.804239  | 2.497093  | 0.739646  | H | 2.801955  | 2.068796  | -1.393707 |
| C | 1.366362  | 3.170174  | -0.556013 | H | 3.569995  | 0.541587  | 1.796829  |
| O | 2.104025  | 2.696609  | -1.679277 | H | 3.716902  | -0.638849 | 3.08157   |
| C | -0.083548 | 2.710946  | -0.67083  | H | 5.678441  | -0.492786 | 1.440961  |
| C | 0.79829   | 0.563117  | 2.012894  | H | 3.406797  | -2.790073 | -1.11775  |
| O | -0.333114 | 0.732783  | 2.478592  | H | 4.470669  | -3.689864 | -0.020858 |
| N | 1.779548  | -0.036754 | 2.713871  | H | 7.133666  | -0.877088 | -0.845566 |
| C | 3.104532  | -0.350204 | 2.222072  | H | 6.919398  | -2.19121  | 0.331123  |
| C | 3.11733   | -1.516405 | 1.229925  | H | 5.244058  | -1.687141 | -2.188108 |
| O | 2.169631  | -2.313271 | 1.167993  | H | 6.076516  | -3.191009 | -1.750718 |
| N | 4.217874  | -1.656621 | 0.477811  | H | 7.037812  | 2.447698  | 1.217712  |
| C | 5.343006  | -0.723216 | 0.427736  | H | 7.257383  | 0.701698  | 1.008817  |
|   |           |           |           | H | 7.894581  | 1.817087  | -0.209621 |
|   |           |           |           | H | 5.144417  | 2.611058  | -1.980721 |
|   |           |           |           | H | 4.626737  | 3.347036  | -0.441045 |
|   |           |           |           | H | 6.319417  | 3.487008  | -0.972585 |



|                     |            |           |           |   |            |           |           |
|---------------------|------------|-----------|-----------|---|------------|-----------|-----------|
|                     |            |           |           | C | 10.19756   | 2.107304  | -0.143149 |
| (6b) PPII structure |            |           |           | C | 9.682045   | 0.521026  | 1.676631  |
|                     |            |           |           | H | -1.639119  | -0.541891 | 2.109564  |
| C                   | -10.431036 | -0.491993 | 0.546058  | H | -1.507843  | -3.57524  | -0.072397 |
| C                   | -9.121539  | -0.652197 | -0.177648 | H | 0.48904    | -2.591008 | 1.410006  |
| O                   | -8.731574  | -1.753268 | -0.611336 | H | -0.074976  | -2.096845 | 3.025731  |
| N                   | -8.378805  | 0.454469  | -0.349881 | H | -0.930796  | -4.485642 | 1.950659  |
| C                   | -7.073937  | 0.393117  | -1.002249 | H | -2.111408  | -3.442513 | 2.783538  |
| C                   | -6.507101  | 1.808215  | -0.78666  | H | -4.641051  | -2.847189 | 0.032707  |
| C                   | -7.755048  | 2.684039  | -0.688558 | H | -3.81351   | -2.653751 | -1.512898 |
| O                   | -8.330721  | 2.916847  | -1.972115 | H | -5.365691  | -1.069145 | -2.177863 |
| C                   | -8.723758  | 1.812259  | 0.095984  | H | -7.195793  | 0.166812  | -2.067517 |
| C                   | -6.163874  | -0.640682 | -0.354393 | H | -5.964375  | 1.852011  | 0.164223  |
| O                   | -6.131642  | -0.803646 | 0.871097  | H | -5.836937  | 2.114317  | -1.593412 |
| N                   | -5.359844  | -1.31443  | -1.194222 | H | -8.557341  | 1.924101  | 1.173004  |
| C                   | -4.270436  | -2.109881 | -0.683132 | H | -9.764252  | 2.050652  | -0.135533 |
| C                   | -3.214371  | -1.241266 | -0.009695 | H | -7.560893  | 3.633765  | -0.181512 |
| O                   | -3.231495  | -0.002201 | -0.055695 | H | -11.117009 | 0.119154  | -0.05024  |
| N                   | -2.233867  | -1.889917 | 0.629465  | H | -10.285885 | 0.00792   | 1.508747  |
| C                   | -1.178848  | -1.189865 | 1.360874  | H | -10.87291  | -1.475854 | 0.705355  |
| C                   | -0.392481  | -2.346801 | 2.012141  | H | -7.677222  | 3.384643  | -2.517267 |
| C                   | -1.399244  | -3.500941 | 1.956198  | H | 0.938493   | 1.831966  | -0.77681  |
| N                   | -2.131825  | -3.301792 | 0.693139  | H | 0.582683   | 0.760501  | 2.993259  |
| C                   | -0.290825  | -0.402852 | 0.408628  | H | -0.975081  | 1.432955  | 2.426134  |
| O                   | -0.064785  | -0.821764 | -0.738271 | H | 2.734385   | 1.942838  | 1.691639  |
| N                   | 0.297191   | 0.701658  | 0.886211  | H | 2.304984   | 3.280042  | 0.596038  |
| C                   | 1.355364   | 1.354577  | 0.116467  | H | 1.057896   | 3.118901  | 2.98312   |
| C                   | 1.92522    | 2.390533  | 1.103848  | H | 2.793765   | 1.422053  | -1.98684  |
| C                   | 0.745623   | 2.692706  | 2.025314  | H | 0.2217     | 4.390969  | 1.195594  |
| O                   | -0.206578  | 3.540866  | 1.388038  | H | 4.014771   | -1.208649 | -1.830108 |
| C                   | 0.088524   | 1.332785  | 2.201167  | H | 4.556922   | 0.164653  | -2.802827 |
| C                   | 2.43696    | 0.360466  | -0.281127 | H | 7.171253   | -0.386763 | 1.095887  |
| O                   | 2.771149   | -0.571219 | 0.460778  | H | 6.302375   | -1.622656 | -2.735643 |
| N                   | 3.047314   | 0.598756  | -1.452663 | H | 5.823454   | -2.726872 | -1.424281 |
| C                   | 4.237207   | -0.138502 | -1.802156 | H | 9.332544   | -1.820334 | 0.150692  |
| C                   | 5.373457   | 0.13256   | -0.81902  | H | 7.835965   | -2.637748 | 0.647583  |
| O                   | 5.381603   | 1.13893   | -0.092636 | H | 8.614089   | -1.774004 | -2.189812 |
| N                   | 6.351499   | -0.781477 | -0.783317 | H | 8.122086   | -3.399615 | -1.675781 |
| C                   | 7.51063    | -0.582569 | 0.077243  | H | 10.922207  | 1.651228  | -0.827078 |
| C                   | 8.264046   | -1.917881 | -0.056998 | H | 9.638875   | 2.876515  | -0.678113 |
| C                   | 7.971248   | -2.332325 | -1.501727 | H | 10.732836  | 2.569578  | 0.68726   |
| C                   | 6.511913   | -1.922711 | -1.705981 | H | 9.796337   | 1.324056  | 2.408881  |
| C                   | 8.362322   | 0.586266  | -0.433325 | H | 8.939535   | -0.179336 | 2.052422  |
| O                   | 8.211039   | 1.018244  | -1.589124 | H | 10.640061  | -0.000975 | 1.574281  |
| N                   | 9.287213   | 1.101557  | 0.396313  |   |            |           |           |

Cartesian Coordinates of PPI and PPII structures of the collagen model peptide Ac-Hyp-Gly-Pro-X-Gly-Pro-NMe<sub>2</sub> optimized at the SMD M06-2X/6-31+G(d) level of theory in water:

|                                                                 |           |           |           |                     |           |           |           |
|-----------------------------------------------------------------|-----------|-----------|-----------|---------------------|-----------|-----------|-----------|
| (1) Ac-Hyp-Gly-Pro- $\alpha$ -azPro(u)-Gly-Pro-NMe <sub>2</sub> |           |           |           | C                   | 5.851852  | 2.145826  | -2.006236 |
|                                                                 |           |           |           | H                   | -6.063865 | -2.251301 | -0.282879 |
| (1a) PPI structure                                              |           |           |           | H                   | -3.662899 | -0.258089 | -0.331016 |
|                                                                 |           |           |           | H                   | -4.174606 | 1.455758  | 2.137481  |
| C                                                               | -6.0056   | -1.636869 | -1.187314 | H                   | -2.711007 | 1.418633  | 1.128954  |
| C                                                               | -6.431243 | -0.219522 | -0.902947 | H                   | -4.434242 | 3.457499  | 0.820229  |
| O                                                               | -7.50563  | 0.237667  | -1.336011 | H                   | -6.485001 | 2.167889  | 0.865455  |
| N                                                               | -5.594186 | 0.55153   | -0.183602 | H                   | -6.264596 | 2.422898  | -0.887174 |
| C                                                               | -4.35305  | 0.099333  | 0.439885  | H                   | -3.032508 | 2.020912  | -1.074289 |
| C                                                               | -3.804331 | 1.383518  | 1.109249  | H                   | -3.701651 | -2.464408 | 2.515269  |
| C                                                               | -4.415489 | 2.508307  | 0.278739  | H                   | -1.874657 | -0.622314 | 1.229073  |
| O                                                               | -3.720722 | 2.707339  | -0.949395 | H                   | -1.520767 | -2.204723 | 1.881388  |
| C                                                               | -5.82265  | 1.986237  | 0.010344  | H                   | 0.25546   | -1.001999 | 0.443325  |
| C                                                               | -4.590318 | -0.980755 | 1.492942  | H                   | 1.585227  | -0.175759 | -1.778728 |
| O                                                               | -5.686223 | -1.104261 | 2.05263   | H                   | 1.668379  | -1.867796 | -1.246381 |
| N                                                               | -3.5347   | -1.75099  | 1.812262  | H                   | -0.187746 | -0.682706 | -3.381332 |
| C                                                               | -2.212781 | -1.660492 | 1.230605  | H                   | 0.856427  | -2.103918 | -3.551747 |
| C                                                               | -2.123631 | -2.282815 | -0.164336 | H                   | -1.841767 | -2.301453 | -2.844462 |
| O                                                               | -2.958505 | -3.111266 | -0.554849 | H                   | -0.64193  | -3.475126 | -2.265195 |
| N                                                               | -1.074204 | -1.917029 | -0.915211 | H                   | -4.975346 | -1.671099 | -1.554675 |
| C                                                               | -0.115958 | -0.871207 | -0.574081 | H                   | -6.675535 | -2.056708 | -1.938573 |
| C                                                               | 0.998729  | -1.082692 | -1.612944 | H                   | -0.771519 | 3.422387  | 0.45311   |
| C                                                               | 0.227718  | -1.5473   | -2.854011 | H                   | -0.988405 | 3.09175   | -1.29286  |
| C                                                               | -0.904511 | -2.412606 | -2.292166 | H                   | 1.343564  | 3.343016  | -1.752405 |
| C                                                               | -0.740163 | 0.516397  | -0.759886 | H                   | 1.236964  | 4.501776  | -0.409554 |
| O                                                               | -1.779908 | 0.683129  | -1.4157   | H                   | 2.332659  | 3.007017  | 1.067564  |
| N                                                               | -0.098615 | 1.546395  | -0.188009 | H                   | 2.840757  | 2.150075  | -0.413749 |
| N                                                               | 1.092287  | 1.381074  | 0.528232  | H                   | 1.814521  | 0.585241  | 3.548717  |
| C                                                               | 1.984933  | 2.521085  | 0.154081  | H                   | 3.672544  | 1.194315  | 1.336596  |
| C                                                               | 1.102087  | 3.456899  | -0.693027 | H                   | 4.018692  | 0.499857  | 2.904499  |
| C                                                               | -0.3247   | 2.967399  | -0.438169 | H                   | 3.417003  | -2.917173 | -0.265078 |
| C                                                               | 0.892515  | 1.061434  | 1.879422  | H                   | 4.332063  | -3.486308 | 1.145317  |
| O                                                               | -0.228094 | 0.857636  | 2.346864  | H                   | 5.802998  | -0.05214  | 1.476875  |
| N                                                               | 2.028969  | 0.974652  | 2.634504  | H                   | 5.389175  | -2.449917 | -1.515904 |
| C                                                               | 3.288601  | 0.504198  | 2.089171  | H                   | 6.066069  | -3.741346 | -0.508243 |
| C                                                               | 3.189606  | -0.915562 | 1.527453  | H                   | 7.278541  | -1.324372 | -0.445641 |
| O                                                               | 2.163131  | -1.595543 | 1.682892  | H                   | 6.935725  | -2.112191 | 1.109485  |
| N                                                               | 4.282479  | -1.394402 | 0.92037   | H                   | 7.534782  | 2.525074  | 0.062711  |
| C                                                               | 5.474057  | -0.613416 | 0.600168  | H                   | 7.423659  | 0.899488  | 0.750939  |
| C                                                               | 6.483296  | -1.70556  | 0.199576  | H                   | 8.152513  | 1.130308  | -0.852021 |
| C                                                               | 5.601246  | -2.753652 | -0.486017 | H                   | 6.13498   | 1.590811  | -2.907659 |
| C                                                               | 4.312443  | -2.745935 | 0.338147  | H                   | 4.805649  | 2.445336  | -2.085075 |
| C                                                               | 5.192961  | 0.331582  | -0.578866 | H                   | 6.472595  | 3.039186  | -1.928039 |
| O                                                               | 4.191717  | 0.151779  | -1.292407 |                     |           |           |           |
| N                                                               | 6.056973  | 1.335259  | -0.808838 | (1b) PPII structure |           |           |           |
| C                                                               | 7.364039  | 1.471898  | -0.172193 |                     |           |           |           |

|   |            |           |           |   |            |           |           |
|---|------------|-----------|-----------|---|------------|-----------|-----------|
| C | -10.471627 | -0.996187 | 0.777714  | H | -8.255219  | 3.296773  | -2.168497 |
| C | -9.167256  | -0.971623 | 0.027264  | H | -5.40066   | -0.740034 | -2.074745 |
| O | -8.668403  | -1.997875 | -0.473112 | H | -4.41962   | -2.652413 | -0.107809 |
| N | -8.550637  | 0.217346  | -0.085137 | H | -3.622418  | -2.119013 | -1.590469 |
| C | -7.269338  | 0.343206  | -0.772473 | H | -1.595155  | -0.015152 | 2.069907  |
| C | -6.872025  | 1.805526  | -0.502015 | H | 0.665372   | -1.531275 | 2.350159  |
| C | -8.217177  | 2.517699  | -0.370134 | H | -0.871975  | -2.100041 | 3.035348  |
| O | -8.827612  | 2.713162  | -1.644156 | H | 0.314506   | -2.83638  | 0.304719  |
| C | -9.065311  | 1.510152  | 0.391395  | H | -0.207431  | -3.967949 | 1.566334  |
| C | -6.218496  | -0.605246 | -0.215364 | H | -1.886908  | -3.209585 | -0.505034 |
| O | -6.143362  | -0.877414 | 0.988199  | H | -2.526949  | -3.560849 | 1.117798  |
| N | -5.342612  | -1.075035 | -1.119627 | H | -10.365642 | -0.520954 | 1.757921  |
| C | -4.15227   | -1.771355 | -0.699221 | H | -10.791185 | -2.030949 | 0.903464  |
| C | -3.213535  | -0.87636  | 0.10417   | H | 1.798997   | 0.820783  | 2.575119  |
| O | -3.371972  | 0.351189  | 0.174192  | H | 0.044718   | 1.067656  | 2.806458  |
| N | -2.20662   | -1.506871 | 0.728698  | H | 0.121467   | 3.24659   | 1.738982  |
| C | -1.155707  | -0.745489 | 1.386917  | H | 1.641224   | 3.276316  | 2.668895  |
| C | -0.353775  | -1.840324 | 2.106905  | H | 2.958214   | 2.750813  | 0.753569  |
| C | -0.413161  | -2.999072 | 1.107163  | H | 1.631005   | 3.60001   | -0.085503 |
| C | -1.838602  | -2.926908 | 0.549565  | H | 3.355453   | 2.395626  | -1.414545 |
| C | -0.305898  | -0.027447 | 0.327625  | H | 4.228549   | -0.166279 | -2.569983 |
| O | -0.465518  | -0.222974 | -0.881718 | H | 5.028212   | 1.402963  | -2.667036 |
| N | 0.672147   | 0.765205  | 0.807695  | H | 6.696965   | -0.190801 | -3.205393 |
| N | 1.491083   | 1.472311  | -0.084768 | H | 6.043449   | -1.788054 | -2.771277 |
| C | 1.881197   | 2.757887  | 0.561303  | H | 6.911204   | -1.177225 | 0.78696   |
| C | 1.093973   | 2.766376  | 1.874837  | H | 8.894323   | -0.75626  | -2.495171 |
| C | 0.894415   | 1.279757  | 2.15986   | H | 8.364216   | -2.38113  | -2.967238 |
| C | 2.457192   | 0.695518  | -0.723713 | H | 9.236228   | -2.025528 | -0.432493 |
| O | 2.494499   | -0.53423  | -0.631759 | H | 7.710962   | -2.905224 | -0.657214 |
| N | 3.290498   | 1.391587  | -1.545905 | H | 9.051649   | -0.476479 | 3.187635  |
| C | 4.490952   | 0.725981  | -1.996568 | H | 8.584525   | -1.590547 | 1.892198  |
| C | 5.413148   | 0.352474  | -0.840013 | H | 10.278079  | -1.09247  | 2.054255  |
| O | 5.255024   | 0.827857  | 0.295989  | H | 10.778924  | 1.495052  | 0.889322  |
| N | 6.396474   | -0.50994  | -1.125825 | H | 9.357012   | 2.468078  | 1.340692  |
| C | 7.404644   | -0.837727 | -0.125872 | H | 10.205186  | 1.509511  | 2.574332  |
| C | 8.216419   | -1.947538 | -0.817247 |   |            |           |           |
| C | 8.162775   | -1.54518  | -2.294313 |   |            |           |           |
| C | 6.744224   | -1.00091  | -2.473146 |   |            |           |           |
| C | 8.270064   | 0.395812  | 0.167226  |   |            |           |           |
| O | 8.278514   | 1.357736  | -0.620993 |   |            |           |           |
| N | 9.016362   | 0.394406  | 1.284647  | C | -5.869053  | -1.657368 | -1.169757 |
| C | 9.890749   | 1.5359    | 1.529959  | C | -6.312732  | -0.230027 | -0.979164 |
| C | 9.238328   | -0.760222 | 2.148374  | O | -7.360087  | 0.202404  | -1.495412 |
| H | -11.239095 | -0.448264 | 0.220708  | N | -5.520035  | 0.577225  | -0.248148 |
| H | -7.394804  | 0.156281  | -1.845287 | C | -4.29318   | 0.164291  | 0.429327  |
| H | -6.333025  | 1.875921  | 0.449596  | C | -3.750063  | 1.490113  | 1.018822  |
| H | -6.248508  | 2.221136  | -1.297064 | C | -4.334188  | 2.559764  | 0.099679  |
| H | -8.138933  | 3.469234  | 0.163813  | O | -3.608067  | 2.682563  | -1.119572 |
| H | -8.915044  | 1.616763  | 1.471073  | C | -5.73805   | 2.026285  | -0.168012 |
| H | -10.127514 | 1.622483  | 0.162743  | C | -4.547267  | -0.838319 | 1.554142  |

(2) Ac-Hyp-Gly-Pro-β-azPro(u)-Gly-Pro-NMe<sub>2</sub>

(2a) PPI structure

|   |           |           |           |                     |            |           |           |
|---|-----------|-----------|-----------|---------------------|------------|-----------|-----------|
| O | -5.660847 | -0.957917 | 2.077538  | H                   | -0.750385  | -3.672391 | -1.987072 |
| N | -3.477782 | -1.528945 | 1.99359   | H                   | -4.836985  | -1.696417 | -1.533371 |
| C | -2.163591 | -1.524235 | 1.387301  | H                   | -6.529134  | -2.133114 | -1.895715 |
| C | -2.121754 | -2.284459 | 0.061355  | H                   | -1.018703  | 3.300365  | 0.110319  |
| O | -2.967691 | -3.149289 | -0.208643 | H                   | -0.696148  | 2.944287  | -1.614205 |
| N | -1.116744 | -1.988531 | -0.774655 | H                   | 1.943706   | 0.776225  | 0.047217  |
| C | -0.107743 | -0.951908 | -0.569389 | H                   | 1.687955   | 3.317247  | -1.33383  |
| C | 0.922747  | -1.269205 | -1.672465 | H                   | 1.062017   | 4.563053  | -0.225931 |
| C | 0.057143  | -1.809879 | -2.814721 | H                   | 1.266518   | 3.163364  | 1.546002  |
| C | -1.027033 | -2.619036 | -2.102742 | H                   | 1.710709   | 0.006402  | 3.589907  |
| C | -0.691079 | 0.449458  | -0.784629 | H                   | 3.588285   | 0.944612  | 1.51548   |
| O | -1.720422 | 0.610115  | -1.464505 | H                   | 3.959353   | 0.074408  | 2.992268  |
| N | -0.011639 | 1.47883   | -0.265278 | H                   | 3.657792   | -2.895045 | -0.606827 |
| C | 1.200512  | 1.391437  | 0.565812  | H                   | 4.708688   | -3.600126 | 0.637802  |
| N | 1.682238  | 2.76875   | 0.69959   | H                   | 5.841503   | -0.070485 | 1.426417  |
| C | 1.086765  | 3.494151  | -0.437252 | H                   | 5.490333   | -2.051958 | -1.860144 |
| C | -0.298442 | 2.877138  | -0.600021 | H                   | 6.358956   | -3.39567  | -1.099145 |
| C | 0.894962  | 0.851694  | 1.971043  | H                   | 7.316222   | -0.895195 | -0.723893 |
| O | -0.246858 | 0.916529  | 2.433851  | H                   | 7.160751   | -1.934359 | 0.707525  |
| N | 1.942693  | 0.406483  | 2.684499  | H                   | 7.200187   | 2.81192   | 0.163714  |
| C | 3.257732  | 0.12188   | 2.154174  | H                   | 7.33315    | 1.11749   | 0.6491    |
| C | 3.303873  | -1.215912 | 1.413404  | H                   | 7.908486   | 1.621752  | -0.953736 |
| O | 2.344283  | -1.999352 | 1.453436  | H                   | 5.292432   | 1.969712  | -2.763866 |
| N | 4.449735  | -1.513999 | 0.783465  | H                   | 4.424704   | 2.936258  | -1.54904  |
| C | 5.515875  | -0.55489  | 0.502501  | H                   | 6.137776   | 3.270318  | -1.891596 |
| C | 6.609059  | -1.452468 | -0.105639 |                     |            |           |           |
| C | 5.79775   | -2.48048  | -0.90069  | (2b) PPII structure |            |           |           |
| C | 4.570637  | -2.740087 | -0.025636 |                     |            |           |           |
| C | 5.030916  | 0.494501  | -0.514366 | C                   | -10.422302 | -0.697764 | 0.177634  |
| O | 3.939376  | 0.342718  | -1.091998 | C                   | -9.061828  | -0.789419 | -0.458356 |
| N | 5.812662  | 1.555381  | -0.758827 | O                   | -8.587239  | -1.869404 | -0.859955 |
| C | 7.138559  | 1.780158  | -0.191504 | N                   | -8.371938  | 0.355792  | -0.593724 |
| C | 5.387203  | 2.484665  | -1.803249 | C                   | -7.033302  | 0.362769  | -1.172513 |
| H | -5.917691 | -2.214621 | -0.22866  | C                   | -6.575692  | 1.821272  | -0.981358 |
| H | -3.588915 | -0.24549  | -0.302474 | C                   | -7.885444  | 2.608108  | -0.983345 |
| H | -4.143134 | 1.636999  | 2.030507  | O                   | -8.407842  | 2.74425   | -2.303349 |
| H | -2.657074 | 1.516732  | 1.061784  | C                   | -8.829555  | 1.698605  | -0.211837 |
| H | -4.364483 | 3.541623  | 0.579203  | C                   | -6.092398  | -0.582362 | -0.439067 |
| H | -6.420598 | 2.27714   | 0.652616  | O                   | -6.172525  | -0.778031 | 0.778938  |
| H | -6.152796 | 2.397828  | -1.106634 | N                   | -5.132026  | -1.138932 | -1.196284 |
| H | -2.928327 | 1.979069  | -1.191124 | C                   | -4.035039  | -1.844968 | -0.58351  |
| H | -3.662945 | -2.204846 | 2.728498  | C                   | -3.176596  | -0.927937 | 0.284003  |
| H | -1.806782 | -0.498393 | 1.274786  | O                   | -3.286108  | 0.306672  | 0.244518  |
| H | -1.470115 | -2.012833 | 2.079181  | N                   | -2.295843  | -1.542196 | 1.088064  |
| H | 0.338033  | -1.048429 | 0.424355  | C                   | -1.335057  | -0.757573 | 1.853222  |
| H | 1.515703  | -0.396222 | -1.954866 | C                   | -0.578838  | -1.828893 | 2.660398  |
| H | 1.601172  | -2.042066 | -1.296335 | C                   | -0.580599  | -3.031746 | 1.712899  |
| H | -0.394165 | -0.981966 | -3.369956 | C                   | -1.966794  | -2.981513 | 1.069124  |
| H | 0.630105  | -2.421703 | -3.514317 | C                   | -0.381693  | -0.021475 | 0.912995  |
| H | -1.998879 | -2.567579 | -2.601081 | O                   | -0.239637  | -0.354592 | -0.272973 |





|                                                                 |            |           |           |   |           |           |           |
|-----------------------------------------------------------------|------------|-----------|-----------|---|-----------|-----------|-----------|
| H                                                               | 7.155824   | -0.270529 | -2.175057 | C | -4.291512 | 0.264657  | 0.42237   |
| H                                                               | 6.158276   | -2.004553 | 0.138058  | C | -3.609657 | 1.55961   | 0.926962  |
| H                                                               | 5.959852   | -2.3039   | -1.606408 | C | -4.135391 | 2.632392  | -0.021636 |
| H                                                               | 7.864966   | -3.672088 | -0.273956 | O | -3.490999 | 2.596739  | -1.291749 |
| H                                                               | 8.806035   | -1.877873 | 1.008222  | C | -5.594797 | 2.224581  | -0.185197 |
| H                                                               | 9.942833   | -1.928384 | -0.365994 | C | -4.579095 | -0.671056 | 1.596512  |
| H                                                               | 7.845906   | -3.461299 | -2.609402 | O | -5.674323 | -0.671126 | 2.170187  |
| H                                                               | 5.18257    | 0.752918  | -2.204081 | N | -3.561317 | -1.450059 | 2.009045  |
| H                                                               | 4.523169   | 2.647508  | -0.099739 | C | -2.256165 | -1.537924 | 1.391011  |
| H                                                               | 3.553262   | 2.223289  | -1.514741 | C | -2.263343 | -2.319609 | 0.076964  |
| H                                                               | 1.828768   | 0.231039  | 2.399112  | O | -3.177377 | -3.10933  | -0.1987   |
| H                                                               | -0.42304   | 1.783665  | 2.736254  | N | -1.213743 | -2.132618 | -0.737192 |
| H                                                               | 1.154063   | 2.298598  | 3.371657  | C | -0.149745 | -1.151531 | -0.540759 |
| H                                                               | -0.099321  | 3.091176  | 0.688074  | C | 0.88016   | -1.563768 | -1.610952 |
| H                                                               | 0.514209   | 4.191372  | 1.937723  | C | 0.002147  | -2.063477 | -2.762283 |
| H                                                               | 2.093397   | 3.438137  | -0.183488 | C | -1.149976 | -2.782776 | -2.058155 |
| H                                                               | 2.80725    | 3.63608   | 1.435293  | C | -0.667304 | 0.266817  | -0.816392 |
| H                                                               | 10.394571  | 0.16939   | 1.228059  | O | -1.680825 | 0.448263  | -1.507036 |
| H                                                               | 10.842995  | 1.669241  | 0.367     | N | 0.044573  | 1.275944  | -0.291121 |
| H                                                               | -0.945456  | -0.488463 | 3.371168  | C | 1.25516   | 1.161801  | 0.531816  |
| H                                                               | 0.627461   | -1.324529 | 3.18805   | C | 1.825495  | 2.600846  | 0.514144  |
| H                                                               | -1.050257  | -2.087955 | -0.157651 | C | 1.075932  | 3.243145  | -0.653913 |
| H                                                               | -1.442838  | -2.743931 | 3.603506  | N | -0.254351 | 2.616469  | -0.644316 |
| H                                                               | -2.94468   | -1.672903 | 2.187466  | C | 0.918662  | 0.737058  | 1.960866  |
| H                                                               | -2.552566  | -3.200109 | 1.35192   | O | -0.224816 | 0.857227  | 2.412419  |
| H                                                               | -2.785318  | -1.64358  | -1.504759 | N | 1.94561   | 0.294811  | 2.709613  |
| H                                                               | -3.813433  | 1.086441  | -1.689281 | C | 3.276018  | 0.012472  | 2.218235  |
| H                                                               | -4.33954   | -0.331765 | -2.601465 | C | 3.341956  | -1.275169 | 1.393285  |
| H                                                               | -6.053705  | 1.174178  | -3.012646 | O | 2.417831  | -2.101197 | 1.423245  |
| H                                                               | -5.793161  | 2.554826  | -1.920958 | N | 4.463027  | -1.479615 | 0.688845  |
| H                                                               | -7.377204  | 0.659135  | 0.851321  | C | 5.514873  | -0.488933 | 0.470525  |
| H                                                               | -8.417329  | 1.290239  | -2.805172 | C | 6.621632  | -1.330799 | -0.191827 |
| H                                                               | -8.0649    | 3.01162   | -2.562646 | C | 5.829335  | -2.330439 | -1.039909 |
| H                                                               | -9.446347  | 1.729756  | -0.626812 | C | 4.611365  | -2.662892 | -0.176289 |
| H                                                               | -8.070219  | 2.729985  | -0.12047  | C | 5.017498  | 0.614729  | -0.48093  |
| H                                                               | -10.016012 | -1.000974 | 2.158097  | O | 3.966255  | 0.45173   | -1.123774 |
| H                                                               | -9.254556  | 0.490128  | 1.587568  | N | 5.749267  | 1.735783  | -0.592289 |
| H                                                               | -10.847252 | 0.021061  | 0.96253   | C | 7.084857  | 1.923841  | -0.033277 |
| H                                                               | -10.681216 | -2.088331 | -1.012623 | C | 5.331387  | 2.726975  | -1.579972 |
| H                                                               | -9.29673   | -3.096514 | -0.525905 | H | -6.086739 | -1.975128 | -0.067514 |
| H                                                               | -10.556182 | -2.68769  | 0.660471  | H | -3.662085 | -0.23484  | -0.322606 |
|                                                                 |            |           |           | H | -3.948226 | 1.788023  | 1.943277  |
| (4) Ac-Hyp-Gly-Pro- $\delta$ -azPro(u)-Gly-Pro-NMe <sub>2</sub> |            |           |           | H | -2.518838 | 1.48924   | 0.934145  |
|                                                                 |            |           |           | H | -4.041021 | 3.636642  | 0.401109  |
| (4a) PPI structure                                              |            |           |           | H | -6.199875 | 2.570002  | 0.661181  |
|                                                                 |            |           |           | H | -6.029817 | 2.595414  | -1.114804 |
| C                                                               | -6.087086  | -1.466443 | -1.036448 | H | -2.747258 | 1.956925  | -1.290339 |
| C                                                               | -6.397113  | 0.000611  | -0.886743 | H | -3.769309 | -2.076006 | 2.780919  |
| O                                                               | -7.420744  | 0.503805  | -1.386299 | H | -1.835401 | -0.539459 | 1.258817  |
| N                                                               | -5.51163   | 0.759494  | -0.212864 | H | -1.588222 | -2.05773  | 2.085138  |

|   |           |           |           |   |            |           |           |
|---|-----------|-----------|-----------|---|------------|-----------|-----------|
| H | 0.267536  | -1.234613 | 0.466326  | C | -1.362057  | -0.993417 | 1.610833  |
| H | 1.544424  | -0.742573 | -1.892861 | C | -0.643934  | -2.148548 | 2.331462  |
| H | 1.485722  | -2.378938 | -1.203079 | C | -0.744577  | -3.297467 | 1.324385  |
| H | -0.37927  | -1.217631 | -3.341871 | C | -2.146003  | -3.134666 | 0.734023  |
| H | 0.543493  | -2.727744 | -3.438671 | C | -0.403865  | -0.24634  | 0.687574  |
| H | -2.107101 | -2.666886 | -2.573608 | O | -0.29453   | -0.509137 | -0.520051 |
| H | -0.952881 | -3.851896 | -1.927444 | N | 0.364669   | 0.694447  | 1.254743  |
| H | -5.100861 | -1.604635 | -1.49171  | C | 1.415975   | 1.392678  | 0.515406  |
| H | -6.84686  | -1.91995  | -1.67352  | C | 2.013568   | 2.339016  | 1.57948   |
| H | -0.792774 | 3.006459  | 0.136671  | C | 0.944943   | 2.32924   | 2.679166  |
| H | 1.955039  | 0.46508   | 0.061067  | N | 0.380186   | 0.97039   | 2.646199  |
| H | 1.560239  | 3.007301  | -1.605936 | C | 2.453048   | 0.397461  | 0.013008  |
| H | 0.969397  | 4.324066  | -0.55723  | O | 2.73599    | -0.620507 | 0.656369  |
| H | 1.581247  | 3.115826  | 1.448571  | N | 3.0546     | 0.715449  | -1.142965 |
| H | 2.909193  | 2.599707  | 0.379723  | C | 4.198186   | -0.032532 | -1.603784 |
| H | 1.707401  | -0.016831 | 3.646443  | C | 5.398351   | 0.122129  | -0.673116 |
| H | 3.65743   | 0.866073  | 1.652852  | O | 5.427515   | 0.974413  | 0.22816   |
| H | 3.936559  | -0.107217 | 3.081856  | N | 6.413832   | -0.724613 | -0.890625 |
| H | 3.701137  | -2.813193 | -0.762461 | C | 7.655165   | -0.592861 | -0.137528 |
| H | 4.772945  | -3.549012 | 0.44641   | C | 8.464844   | -1.813922 | -0.608682 |
| H | 5.83557   | -0.062272 | 1.423177  | C | 8.032528   | -1.969144 | -2.06999  |
| H | 5.50931   | -1.858011 | -1.974032 | C | 6.539288   | -1.637562 | -2.044317 |
| H | 6.409712  | -3.221368 | -1.287248 | C | 8.356232   | 0.722585  | -0.503832 |
| H | 7.315642  | -0.725884 | -0.779563 | O | 8.044121   | 1.332124  | -1.541092 |
| H | 7.184977  | -1.84553  | 0.592703  | N | 9.311553   | 1.181991  | 0.324837  |
| H | 7.154381  | 2.930971  | 0.384107  | C | 10.051829  | 2.372684  | -0.082819 |
| H | 7.294237  | 1.209061  | 0.759447  | C | 9.92176    | 0.407362  | 1.401449  |
| H | 7.841002  | 1.814917  | -0.818662 | H | -11.184115 | -0.028495 | -0.142926 |
| H | 5.569196  | 2.390936  | -2.595531 | H | -7.244161  | 0.342481  | -2.160312 |
| H | 4.256726  | 2.903741  | -1.509149 | H | -6.129239  | 2.007752  | 0.142402  |
| H | 5.862194  | 3.658287  | -1.378536 | H | -6.052392  | 2.369296  | -1.598834 |

## (4b) PPII structure

|   |            |           |           |   |            |           |           |
|---|------------|-----------|-----------|---|------------|-----------|-----------|
| C | -10.453993 | -0.638471 | 0.399617  | H | -7.84767   | 3.689297  | -0.073477 |
| C | -9.147415  | -0.673861 | -0.346137 | H | -8.695458  | 1.818304  | 1.177479  |
| O | -8.695431  | -1.721753 | -0.846532 | H | -9.943648  | 1.977145  | -0.090969 |
| N | -8.477922  | 0.485902  | -0.460156 | H | -7.988245  | 3.593939  | -2.41109  |
| C | -7.160552  | 0.53706   | -1.085403 | H | -5.275078  | -0.705709 | -2.248747 |
| C | -6.686302  | 1.976316  | -0.800662 | H | -4.60354   | -2.642529 | -0.187175 |
| C | -7.986742  | 2.761922  | -0.636812 | H | -3.650605  | -2.207423 | -1.610645 |
| O | -8.593692  | 3.034484  | -1.897937 | H | -1.817379  | -0.285519 | 2.304994  |
| C | -8.886083  | 1.781588  | 0.098975  | H | 0.387159   | -1.900597 | 2.597457  |
| C | -6.204678  | -0.464288 | -0.450978 | H | -1.192953  | -2.387091 | 3.247655  |
| O | -6.23174   | -0.715157 | 0.759857  | H | 0.008201   | -3.175234 | 0.538844  |
| N | -5.299647  | -1.006694 | -1.281129 | H | -0.608243  | -4.278023 | 1.784801  |
| C | -4.21192   | -1.799701 | -0.765378 | H | -2.204262  | -3.469691 | -0.304027 |
| C | -3.263443  | -0.977861 | 0.103179  | H | -2.897284  | -3.671962 | 1.323057  |
| O | -3.306431  | 0.261434  | 0.134672  | H | -10.322135 | -0.198059 | 1.392999  |
| N | -2.382748  | -1.680834 | 0.829102  | H | -10.836361 | -1.654758 | 0.496879  |
|   |            |           |           | H | 1.078089   | 0.338189  | 3.052968  |
|   |            |           |           | H | 0.973902   | 1.938688  | -0.323154 |
|   |            |           |           | H | 0.14571    | 3.042453  | 2.461614  |



|   |          |           |           |   |           |           |           |
|---|----------|-----------|-----------|---|-----------|-----------|-----------|
| H | 1.346423 | 2.52731   | 3.673564  | H | 9.542783  | -1.676499 | -0.494037 |
| H | 2.951341 | 1.927707  | 1.966882  | H | 8.161414  | -2.68545  | -0.020078 |
| H | 2.203746 | 3.332493  | 1.171047  | H | 10.060707 | 1.055359  | 2.270153  |
| H | 2.839265 | 1.604345  | -1.580564 | H | 9.300624  | -0.435364 | 1.697265  |
| H | 3.9406   | -1.092058 | -1.698116 | H | 10.900087 | 0.028575  | 1.084254  |
| H | 4.471643 | 0.332468  | -2.597453 | H | 10.753092 | 2.140853  | -0.892531 |
| H | 6.205241 | -1.148954 | -2.962894 | H | 9.36231   | 3.147336  | -0.420431 |
| H | 5.930283 | -2.532729 | -1.879519 | H | 10.6103   | 2.740981  | 0.778879  |
| H | 7.432574 | -0.615482 | 0.930779  |   |           |           |           |
| H | 8.565016 | -1.247875 | -2.698205 |   |           |           |           |
| H | 8.21926  | -2.971343 | -2.461108 |   |           |           |           |
